# Supplementary material for: NMR-Based Metabolic Profiling of Field-Grown Leaves from Sugar Beet Plants Harbouring Different Levels of Resistance to Cercospora Leaf Spot Disease
Source: PubMed Central journal article supplement (PMC5372207; doi:10.3390/metabo7010004), 2017-01-26
Supplement: metabolites-07-00004-s001.pdf [file metabolites-07-00004-s001.pdf]

# Supplementary Materials: NMR-Based Metabolic Profiling of Field-Grown Leaves from Sugar Beet Plants Harboured Different Levels of Resistance to *Cercospora* Leaf Spot Disease

Yasuyo Sekiyama, Kazuyuki Okazaki, Jun Kikuchi and Seishi Ikeda

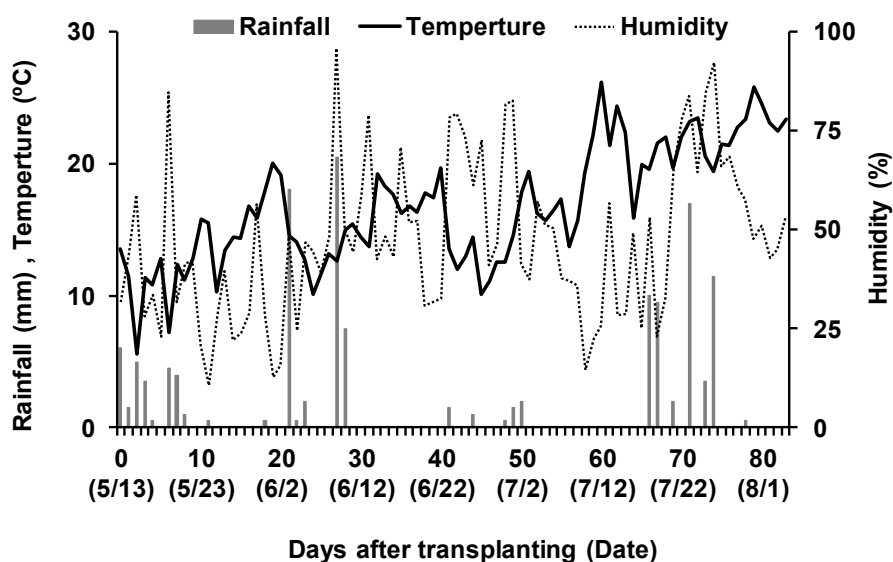

**Figure S1.** Daily values of mean air temperature, mean relative humidity, and rainfall during the field trial in 2015 (Memuro, Hokkaido, Japan; 42°89.2'N/143°0.7'E, 92 m a.s.l.).

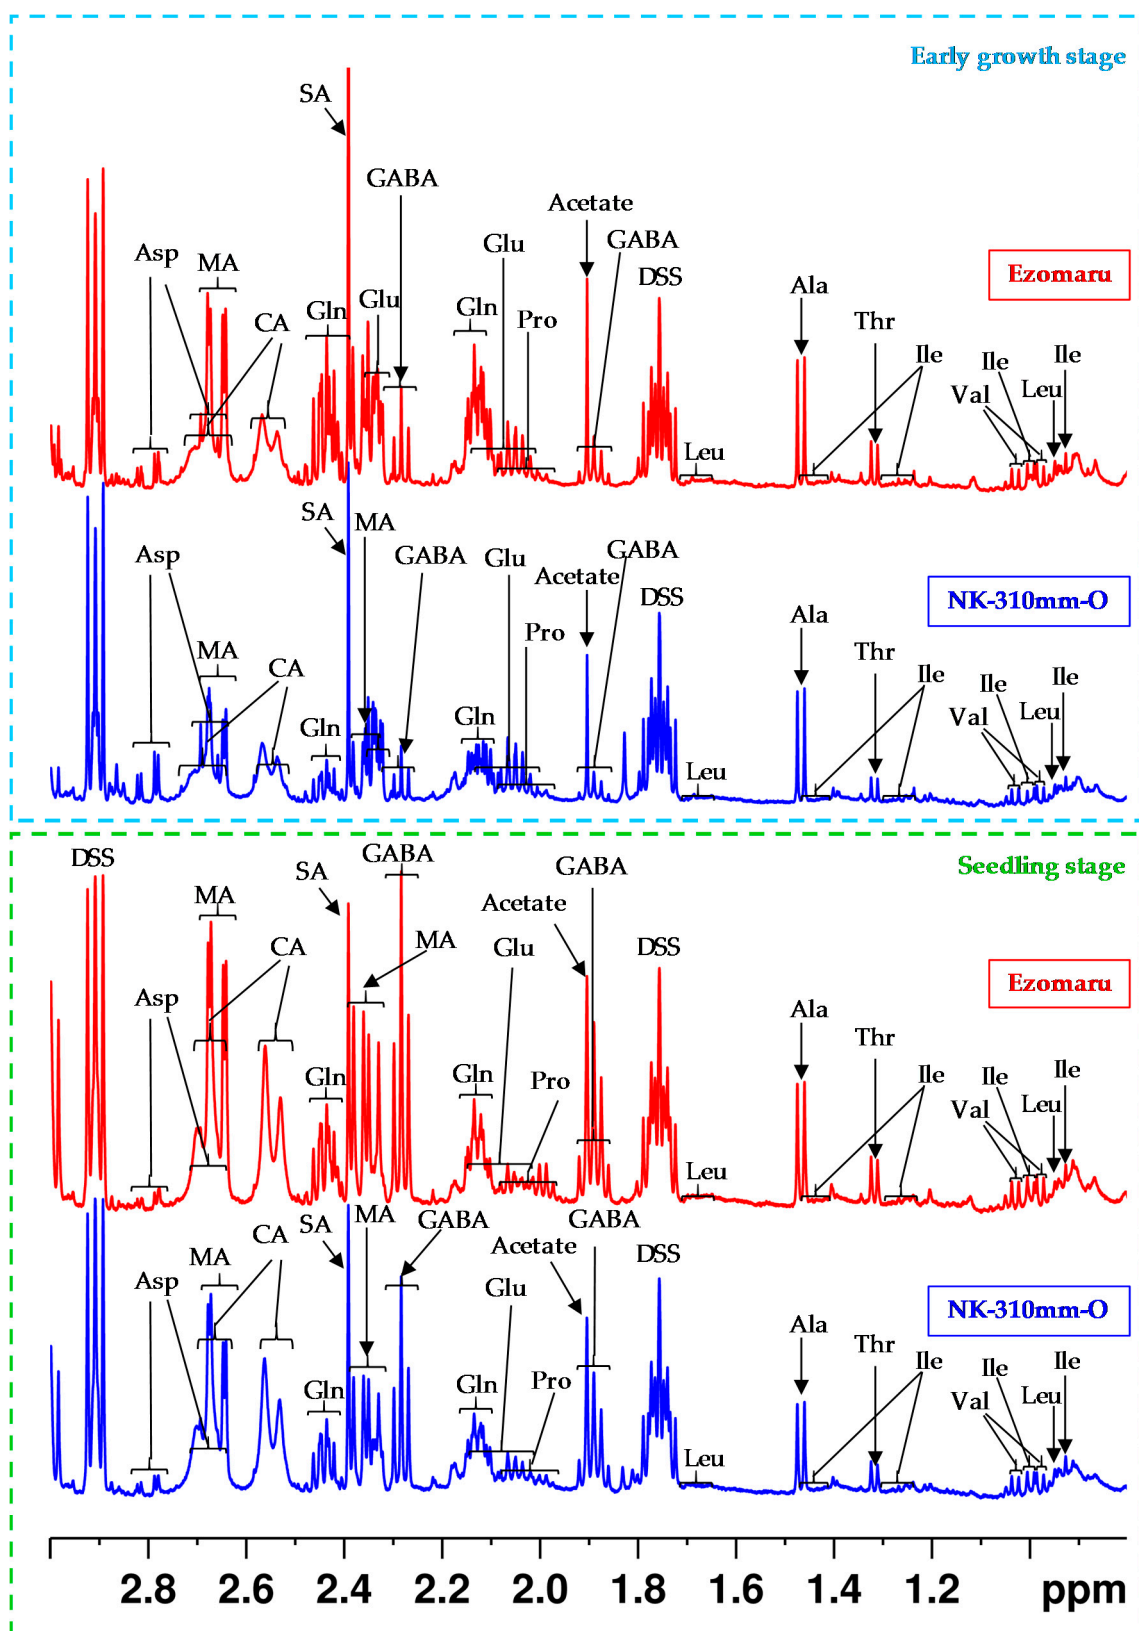

Figure S2. Cont.

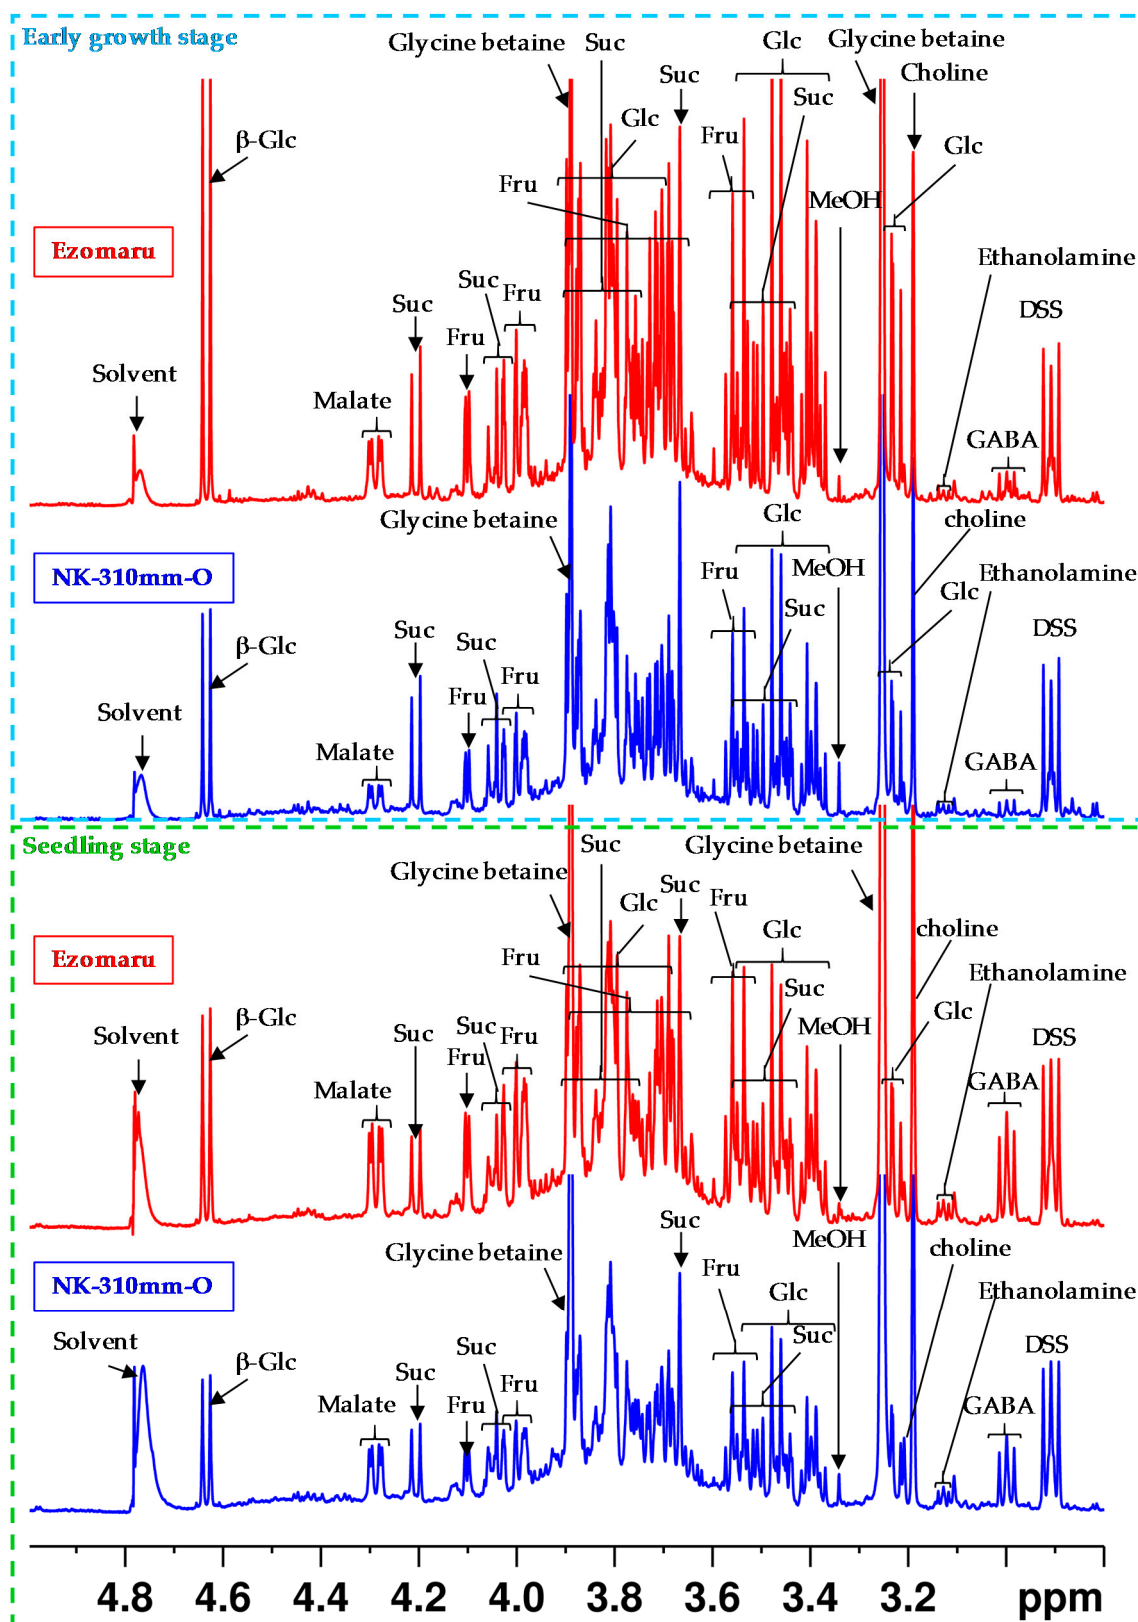

Figure S2. Cont.

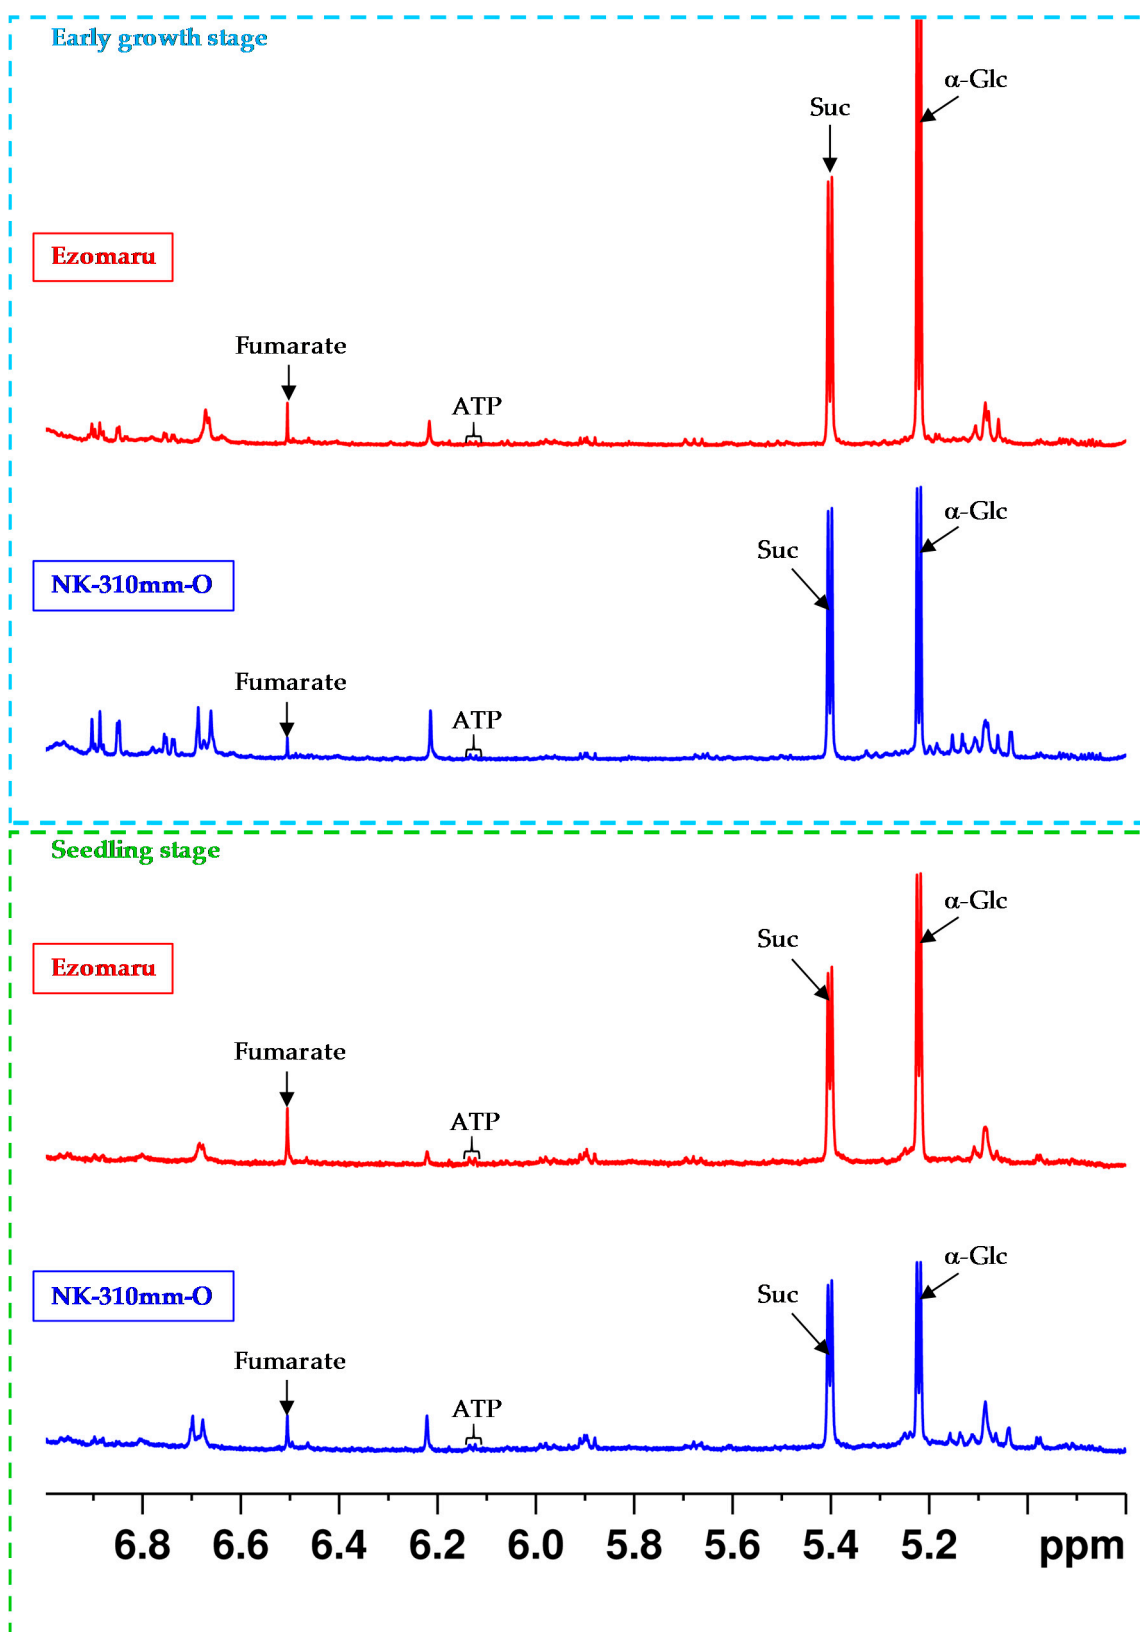

Figure S2. Cont.

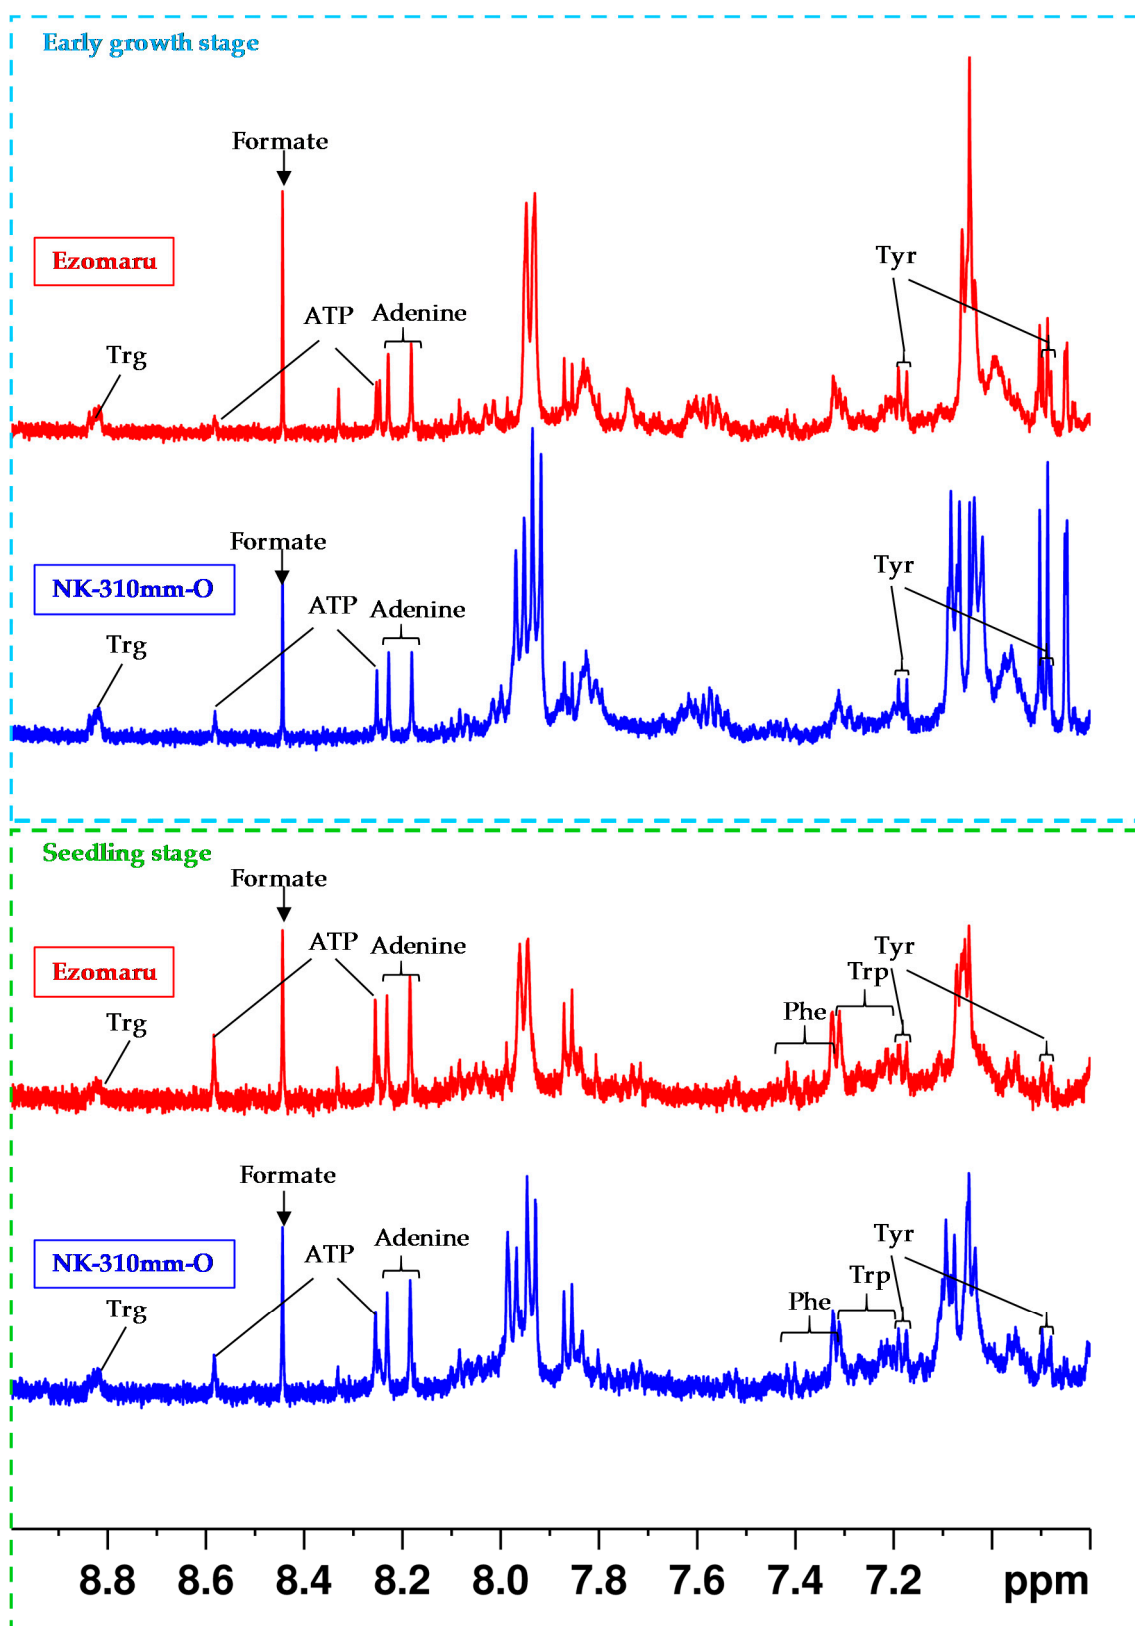

**Figure S2.** Metabolite annotation of representative  $^1\text{H-NMR}$  spectra of sugar beet leaf samples. The spectra of Ezomaru (red line) and at the seedling stage represented by NK-310mm-O (blue line) are shown in the light-green dashed-line rectangle (bottom). Those at an early growth stage are shown in the light-blue dashed-line rectangle (top).

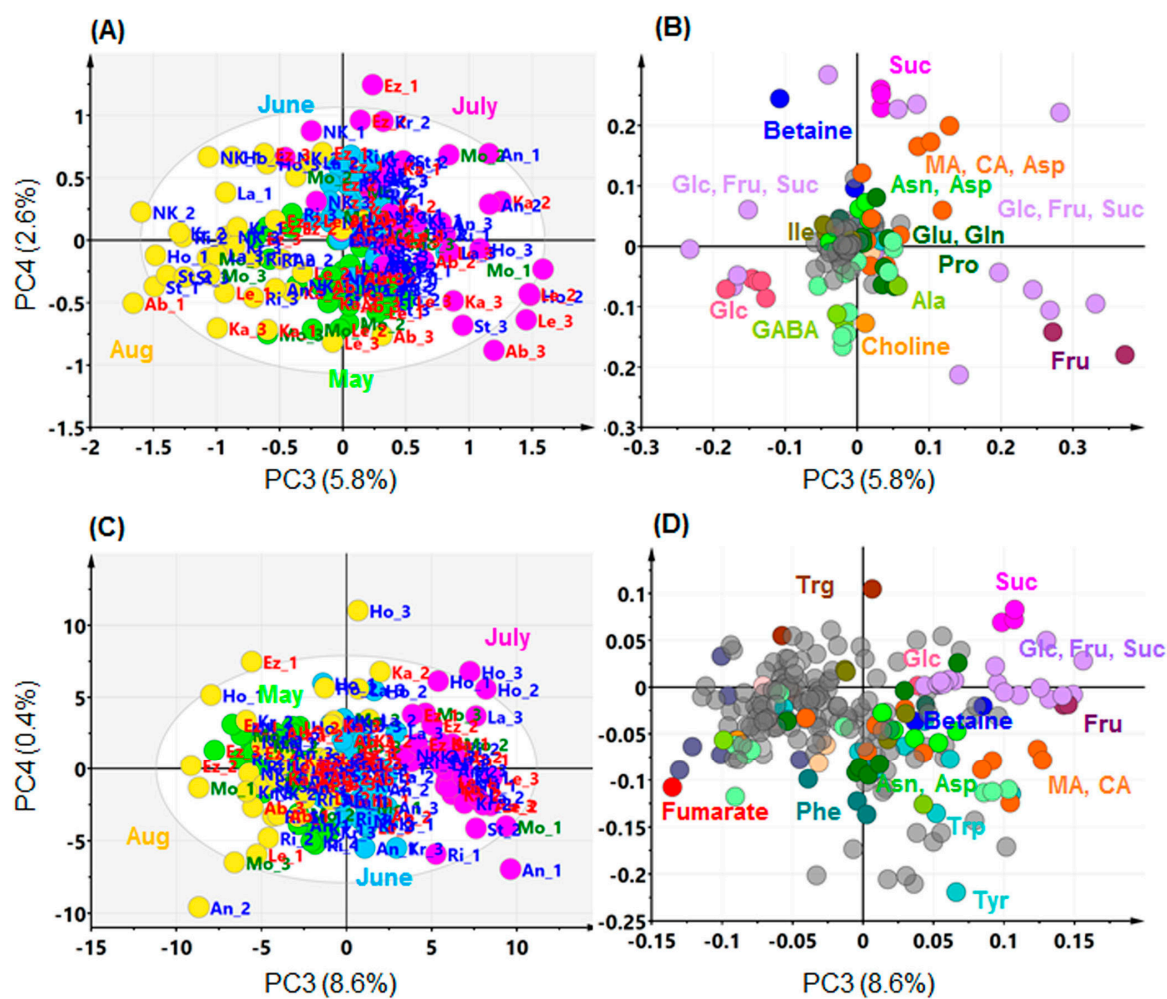

**Figure S3.** PCs 3 and 4 plane of the PCA score (A,C) and loading (B,D) plots of NMR data of sugar beet leaves. Pareto (A,B) or unit variance (C,D) scaling was applied to the NMR buckets. The abbreviations of genotypes harbouring weak (red), moderate (green), and strong (blue) resistance levels are defined in Table 1. Grey circles in the loading plots indicate Unannotated NMR buckets.

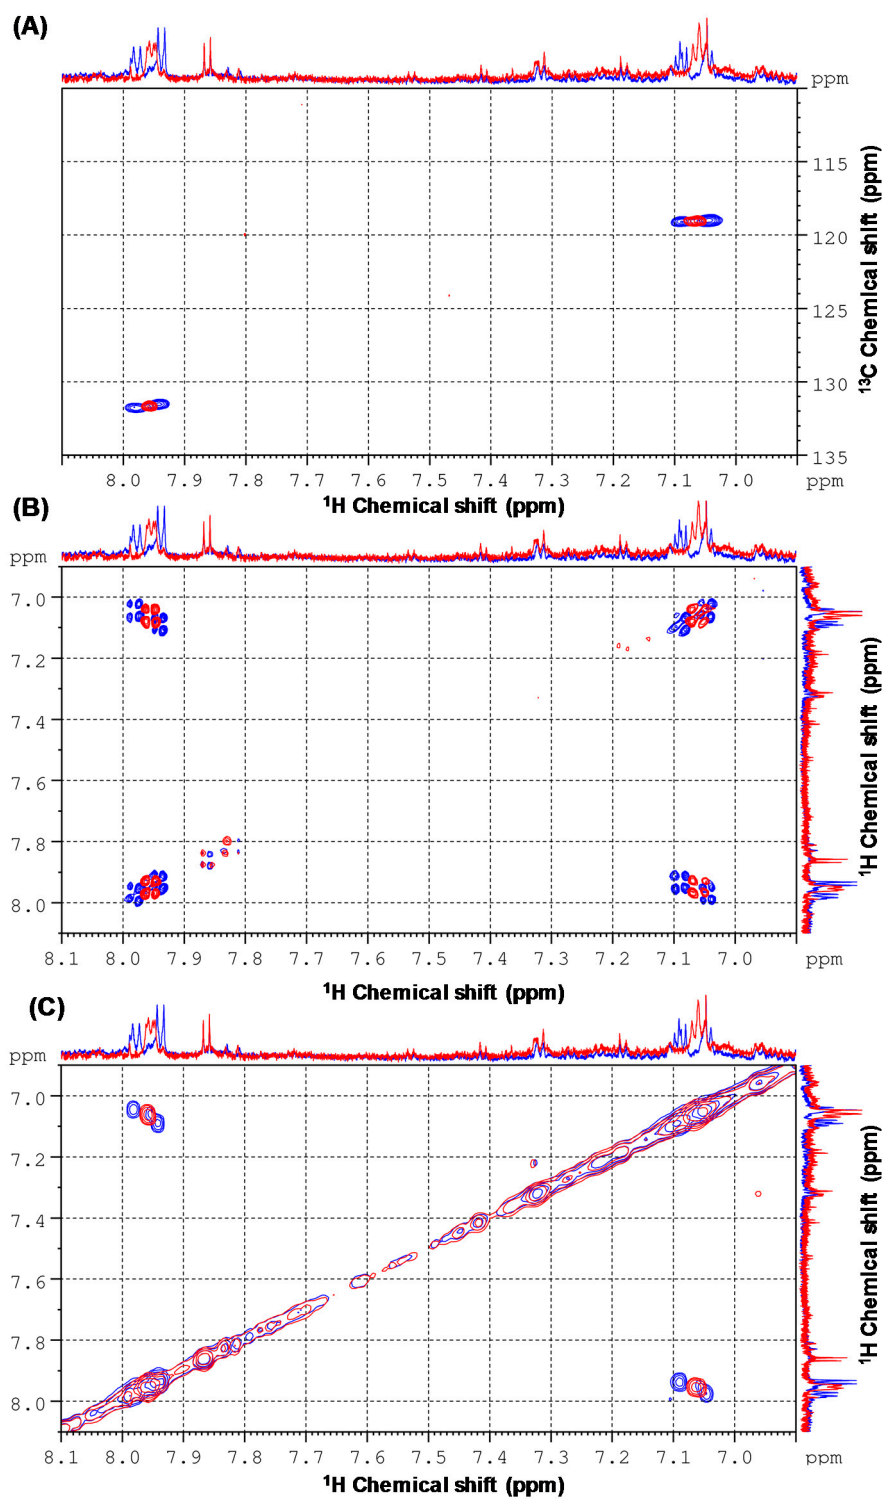

**Figure S4.** Expanded views of an aromatic region of  $^1\text{H}$ - $^{13}\text{C}$  HSQC (A),  $^1\text{H}$ - $^1\text{H}$  DQF-COSY (B), and  $^1\text{H}$ - $^1\text{H}$  TOCSY (C) spectra of Ez-2 (red) and NK-1 (blue) at the seedling stage.

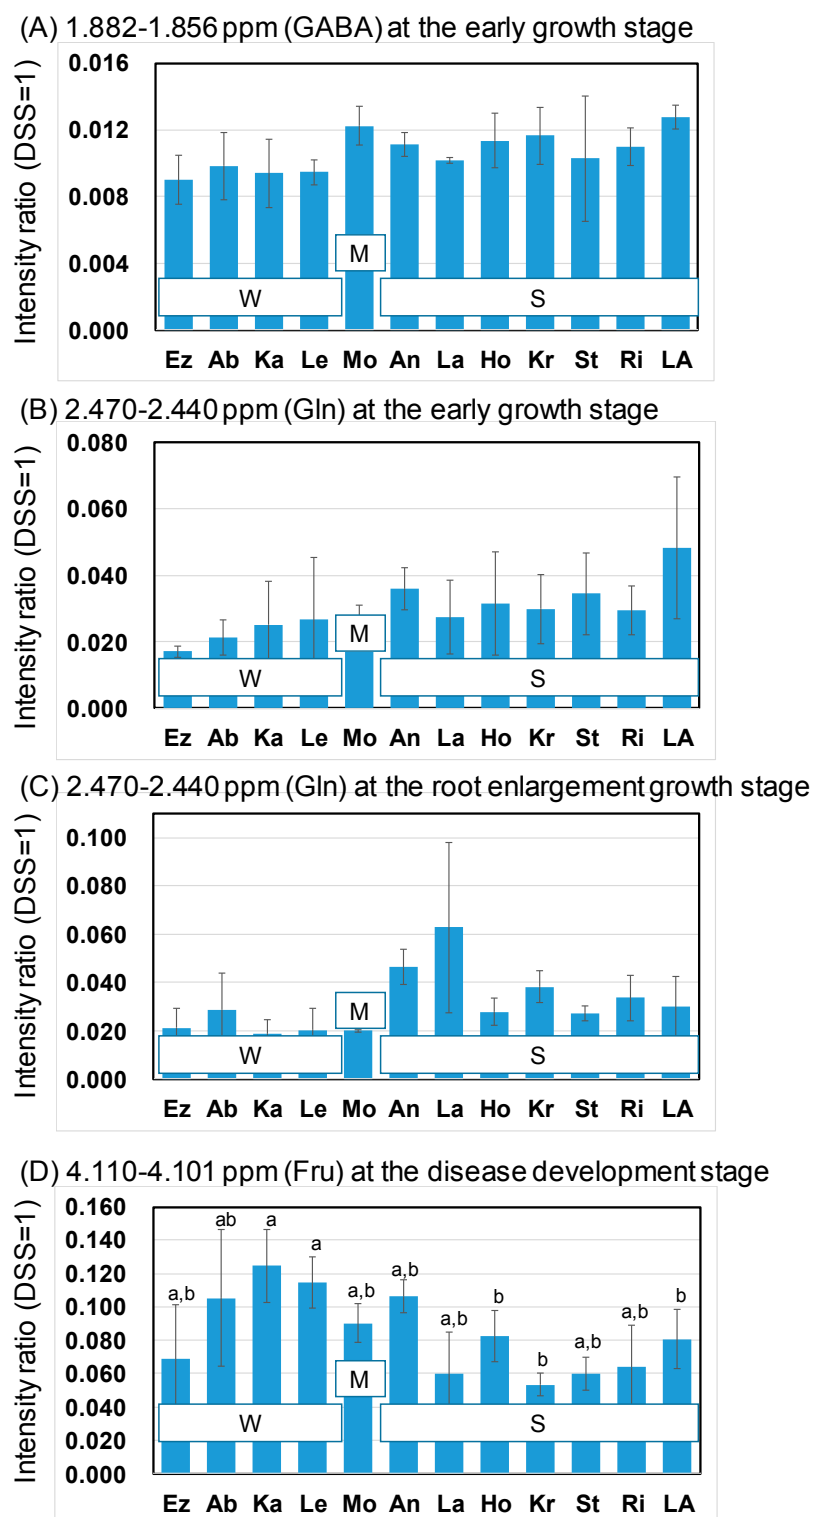

**Figure S5.** Relative intensity of the isolated NMR buckets annotated to GABA (1.882–1.856 ppm) and Gln (2.470–2.440 ppm) at the early growth stage (A,B), Gln at the root-enlargement stage (C), and Fru (4.110–4.101 ppm) at the disease development stage (D). Letters a and b superscripting the error bars indicate statistically significant differences among genotypes obtained using Tukey’s multiple comparison test ( $p < 0.05$ ). The known resistance levels are indicated in white rectangles: W represents genotypes with weak resistance, M represents genotypes with moderate resistance, and S represents genotypes with strong resistance. No significant difference with the  $p$ -values less than 0.05 was observed in the intensity of GABA and Gln among genotypes.



**Table S1.** PLS model parameters derived from the <sup>1</sup>H-NMR spectra of sugar beet leaves. DSIs recorded at four time points were separately used as Y variables.

| Growth Stage<br>(Sampling Date)         | DSIs on   | Pareto Scaling  |                                            |                                            | Unit Variance Scaling |                                            |                                            |
|-----------------------------------------|-----------|-----------------|--------------------------------------------|--------------------------------------------|-----------------------|--------------------------------------------|--------------------------------------------|
|                                         |           | NC <sup>1</sup> | R <sup>2</sup><br>(Intercept) <sup>2</sup> | Q <sup>2</sup><br>(Intercept) <sup>2</sup> | NC <sup>1</sup>       | R <sup>2</sup><br>(Intercept) <sup>2</sup> | Q <sup>2</sup><br>(Intercept) <sup>2</sup> |
| Seedling stage (11 May)                 | 3 August  | 0               |                                            |                                            | 1                     | 0.79<br>(0.43)                             | 0.4<br>(-0.12)                             |
|                                         | 11 August | 0               |                                            |                                            | 1                     | 0.76<br>(0.43)                             | 0.32<br>(-0.12)                            |
|                                         | 17 August | 0               |                                            |                                            | 2                     | 0.83<br>(0.72)                             | 0.41<br>(-0.09)                            |
|                                         | 24 August | 0               |                                            |                                            | 1                     | 0.78<br>(0.43)                             | 0.26<br>(-0.11)                            |
| Early growth stage<br>(18 July)         | 3 August  | 3               | 0.66<br>(0.36)                             | 0.45<br>(-0.20)                            | 1                     | 0.71<br>(0.53)                             | 0.51<br>(-0.15)                            |
|                                         | 11 August | 3               | 0.62<br>(0.36)                             | 0.36<br>(-0.21)                            | 1                     | 0.67<br>(0.53)                             | 0.45<br>(-0.14)                            |
|                                         | 17 August | 3               | 0.62<br>(0.37)                             | 0.36<br>(-0.19)                            | 1                     | 0.66<br>(0.54)                             | 0.47<br>(-0.14)                            |
|                                         | 24 August | 3               | 0.6<br>(0.37)                              | 0.33<br>(-0.19)                            | 1                     | 0.65<br>(0.53)                             | 0.43<br>(-0.12)                            |
| Root-enlargement stage<br>(13 July)     | 3 August  | 3               | 0.53<br>(0.29)                             | 0.20<br>(-0.23)                            | 1                     | 0.61<br>(0.53)                             | 0.24<br>(-0.11)                            |
|                                         | 11 August | 1               | 0.28<br>(0.07)                             | 0.06<br>(-0.07)                            | 1                     | 0.58<br>(0.53)                             | 0.18<br>(-0.11)                            |
|                                         | 17 August | 2               | 0.38<br>(0.19)                             | 0.17<br>(-0.14)                            | 1                     | 0.59<br>(0.53)                             | 0.22<br>(-0.11)                            |
|                                         | 24 August | 3               | 0.40<br>(0.20)                             | 0.19<br>(-0.14)                            | 1                     | 0.57<br>(0.53)                             | 0.15<br>(-0.10)                            |
| Disease development stage<br>(4 August) | 3 August  | 0               |                                            |                                            | 1                     | 0.78<br>(0.54)                             | 0.4<br>(-0.11)                             |
|                                         | 11 August | 0               |                                            |                                            | 1                     | 0.79<br>(0.55)                             | 0.37<br>(-0.12)                            |
|                                         | 17 August | 0               |                                            |                                            | 1                     | 0.78<br>(0.55)                             | 0.32<br>(-0.11)                            |
|                                         | 24 August | 0               |                                            |                                            | 1                     | 0.75<br>(0.55)                             | 0.31<br>(-0.12)                            |

<sup>1</sup> NC: Number of components; <sup>2</sup> Intercept of the permutation plot ( $n = 500$ ) where the vertical axis corresponds to  $R^2$  and  $Q^2$  values of each model and the horizontal axis corresponds to the correlation coefficient between the original  $Y$  and the permuted  $Y$ .

**Table S2.** OPLS model parameters derived from the <sup>1</sup>H-NMR spectra of sugar beet leaves. DSIs recorded at four time points were separately used as Y variables.

| Growth Stage<br>(Sampling Date)         | DSIs on   | Pareto Scaling  |                                            |                                            | Unit Variance Scaling |                                            |                                            |
|-----------------------------------------|-----------|-----------------|--------------------------------------------|--------------------------------------------|-----------------------|--------------------------------------------|--------------------------------------------|
|                                         |           | NC <sup>1</sup> | R <sup>2</sup><br>(Intercept) <sup>2</sup> | Q <sup>2</sup><br>(Intercept) <sup>2</sup> | NC <sup>1</sup>       | R <sup>2</sup><br>(Intercept) <sup>2</sup> | Q <sup>2</sup><br>(Intercept) <sup>2</sup> |
| Seedling stage<br>(11 May)              | 3 August  | 0 + 0           |                                            |                                            | 1 + 1                 | 0.87<br>(0.73)                             | 0.53<br>(-0.39)                            |
|                                         | 11 August | 0 + 0           |                                            |                                            | 1 + 1                 | 0.85<br>(0.73)                             | 0.46<br>(-0.38)                            |
|                                         | 17 August | 0 + 0           |                                            |                                            | 1 + 1                 | 0.84<br>(0.73)                             | 0.44<br>(-0.38)                            |
|                                         | 24 August | 0 + 0           |                                            |                                            | 1 + 1                 | 0.91<br>(0.72)                             | 0.40<br>(-0.38)                            |
| Early growth stage<br>(18 July)         | 3 August  | 1 + 2           | 0.66<br>(0.37)                             | 0.43<br>(-0.44)                            | 1 + 2                 | 0.95<br>(0.90)                             | 0.57<br>(-0.44)                            |
|                                         | 11 August | 1 + 2           | 0.62<br>(0.37)                             | 0.35<br>(-0.43)                            | 1 + 2                 | 0.95<br>(0.90)                             | 0.52<br>(-0.42)                            |
|                                         | 17 August | 1 + 2           | 0.62<br>(0.36)                             | 0.36<br>(-0.45)                            | 1 + 2                 | 0.95<br>(0.78)                             | 0.57<br>(-0.38)                            |
|                                         | 24 August | 1 + 2           | 0.60<br>(0.37)                             | 0.34<br>(-0.44)                            | 1 + 0                 | 0.65<br>(0.53)                             | 0.43<br>(-0.32)                            |
| Root-enlargement stage<br>(13 July)     | 3 August  | 1 + 2           | 0.53<br>(0.29)                             | 0.31<br>(-0.44)                            | 1 + 0                 | 0.61<br>(0.52)                             | 0.24<br>(-0.32)                            |
|                                         | 11 August | 1 + 2           | 0.51<br>(0.30)                             | 0.28<br>(-0.46)                            | 1 + 0                 | 0.58<br>(0.53)                             | 0.18<br>(-0.32)                            |
|                                         | 17 August | 1 + 2           | 0.52<br>(0.30)                             | 0.30<br>(-0.42)                            | 1 + 0                 | 0.59<br>(0.53)                             | 0.22<br>(-0.31)                            |
|                                         | 24 August | 1 + 2           | 0.51<br>(0.30)                             | 0.29<br>(-0.44)                            | 1 + 0                 | 0.57<br>(0.53)                             | 0.15<br>(-0.31)                            |
| Disease development stage<br>(4 August) | 3 August  | 1 + 1           | 0.48<br>(0.18)                             | 0.19<br>(-0.28)                            | 1 + 1                 | 0.89<br>(0.81)                             | 0.45<br>(-0.34)                            |
|                                         | 11 August | 1 + 1           | 0.48<br>(0.18)                             | 0.20<br>(-0.31)                            | 1 + 1                 | 0.90<br>(0.81)                             | 0.50<br>(-0.34)                            |
|                                         | 17 August | 1 + 1           | 0.52<br>(0.17)                             | 0.19<br>(-0.30)                            | 1 + 1                 | 0.89<br>(0.81)                             | 0.46<br>(-0.35)                            |
|                                         | 24 August | 1 + 4           | 0.83<br>(0.64)                             | 0.43<br>(-0.77)                            | 1 + 1                 | 0.86<br>(0.81)                             | 0.45<br>(-0.37)                            |

<sup>1</sup> NC: Number of components; <sup>2</sup> Intercept of the permutation plot ( $n = 500$ ) where the vertical axis corresponds to  $R^2$  and  $Q^2$  values of each model and the horizontal axis corresponds to the correlation coefficient between the original  $Y$  and the permuted  $Y$ .

**Table S3.** The number of permuted  $R^2$  and  $Q^2$  values exceeding the original values for PLS models.

| Growth Stage<br>(Sampling Date)         | DSIs on   | Pareto Scaling |       | Unit Variance Scaling |       |
|-----------------------------------------|-----------|----------------|-------|-----------------------|-------|
|                                         |           | $R^2$          | $Q^2$ | $R^2$                 | $Q^2$ |
| Seedling stage<br>(11 May)              | 3 August  |                |       | 4                     | 0     |
|                                         | 11 August |                |       | 8                     | 0     |
|                                         | 17 August |                |       | 18                    | 0     |
|                                         | 24 August |                |       | 0                     | 1     |
| Early growth stage<br>(18 July)         | 3 August  | 0              | 0     | 16                    | 1     |
|                                         | 11 August | 2              | 0     | 15                    | 0     |
|                                         | 17 August | 1              | 1     | 21                    | 0     |
|                                         | 24 August | 3              | 1     | 42                    | 0     |
| Root-enlargement stage<br>(13 July)     | 3 August  | 9              | 6     | 80                    | 0     |
|                                         | 11 August | 4              | 37    | 132                   | 11    |
|                                         | 17 August | 20             | 12    | 109                   | 3     |
|                                         | 24 August | 9              | 6     | 141                   | 11    |
| Disease development stage<br>(4 August) | 3 August  |                |       | 25                    | 0     |
|                                         | 11 August |                |       | 15                    | 0     |
|                                         | 17 August |                |       | 22                    | 0     |
|                                         | 24 August |                |       | 79                    | 0     |

**Table S4.** The number of permuted  $R^2$  and  $Q^2$  values exceeding the original values for OPLS models.

| Growth Stage<br>(Sampling Date)         | DSIs on   | Pareto Scaling |       | Unit Variance Scaling |       |
|-----------------------------------------|-----------|----------------|-------|-----------------------|-------|
|                                         |           | $R^2$          | $Q^2$ | $R^2$                 | $Q^2$ |
| Seedling stage<br>(11 May)              | 3 August  |                |       | 0                     | 0     |
|                                         | 11 August |                |       | 0                     | 1     |
|                                         | 17 August |                |       | 18                    | 1     |
|                                         | 24 August |                |       | 0                     | 2     |
| Early growth stage<br>(18 July)         | 3 August  | 1              | 0     | 15                    | 0     |
|                                         | 11 August | 2              | 1     | 39                    | 0     |
|                                         | 17 August | 1              | 0     | 58                    | 0     |
|                                         | 24 August | 4              | 2     | 66                    | 0     |
| Root-enlargement stage<br>(13 July)     | 3 August  | 11             | 1     | 78                    | 4     |
|                                         | 11 August | 9              | 1     | 130                   | 6     |
|                                         | 17 August | 9              | 1     | 117                   | 1     |
|                                         | 24 August | 7              | 0     | 155                   | 15    |
| Disease development stage<br>(4 August) | 3 August  | 3              | 5     | 1                     | 0     |
|                                         | 11 August | 2              | 5     | 2                     | 0     |
|                                         | 17 August | 0              | 1     | 4                     | 0     |
|                                         | 24 August | 2              | 0     | 9                     | 0     |

**Table S5.** NMR buckets with the highest PLS VIP values (rank 1–20) at the seedling stage.

|                | Y Variable = DSIs at 3 August |                    |      | Y Variable = DSIs at 11 August |                    |      | Y Variable = DSIs at 17 August |                    |      | Y Variable = DSIs at 24 August |                    |      |
|----------------|-------------------------------|--------------------|------|--------------------------------|--------------------|------|--------------------------------|--------------------|------|--------------------------------|--------------------|------|
|                | Bucket (ppm)                  | Presumed Compounds | VIP  | Bucket (ppm)                   | Presumed Compounds | VIP  | Bucket (ppm)                   | Presumed Compounds | VIP  | Bucket (ppm)                   | Presumed Compounds | VIP  |
| Seedling stage | 6.24–6.20                     | Unannotated        | 2.47 | 9.28–9.24                      | Unannotated        | 2.44 | 9.28–9.24                      | Unannotated        | 2.37 | 5.04–5.00                      | Unannotated        | 2.63 |
|                | 5.04–5.00                     | Unannotated        | 2.46 | 6.24–6.20                      | Unannotated        | 2.41 | 3.96–3.92                      | Unannotated        | 2.32 | 0.16–0.12                      | Unannotated        | 2.53 |
|                | 3.96–3.92                     | Unannotated        | 2.46 | 3.96–3.92                      | Unannotated        | 2.40 | 6.76–6.72                      | Unannotated        | 2.29 | 3.96–3.92                      | Unannotated        | 2.51 |
|                | 9.28–9.24                     | Unannotated        | 2.40 | 6.16–6.12                      | ATP                | 2.39 | 5.04–5.00                      | Unannotated        | 2.29 | 5.96–5.92                      | Unannotated        | 2.45 |
|                | 6.16–6.12                     | ATP                | 2.39 | 5.04–5.00                      | Unannotated        | 2.30 | 6.24–6.20                      | Unannotated        | 2.24 | 9.28–9.24                      | Unannotated        | 2.41 |
|                | 6.76–6.72                     | Unannotated        | 2.31 | 0.16–0.12                      | Unannotated        | 2.27 | 1.32–1.28                      | Thr                | 2.09 | 6.24–6.20                      | Unannotated        | 2.40 |
|                | 8.00–7.96                     | Unannotated        | 2.30 | 8.84–8.80                      | Trg                | 2.22 | 8.00–7.96                      | Unannotated        | 2.08 | 8.00–7.96                      | Unannotated        | 2.33 |
|                | 0.16–0.12                     | Unannotated        | 2.20 | 6.76–6.72                      | Unannotated        | 2.22 | 0.16–0.12                      | Unannotated        | 2.01 | 5.08–5.04                      | Unannotated        | 2.26 |
|                | 1.32–1.28                     | Thr                | 2.12 | 5.96–5.92                      | Unannotated        | 2.21 | 8.84–8.80                      | Trg                | 2.00 | 6.76–6.72                      | Unannotated        | 2.24 |
|                | 8.84–8.80                     | Trg                | 2.12 | 8.60–8.56                      | ATP                | 2.20 | 6.16–6.12                      | ATP                | 1.94 | 5.72–5.68                      | Unannotated        | 2.23 |
|                | 8.60–8.56                     | ATP                | 2.09 | 1.32–1.28                      | Thr                | 2.13 | 1.84–1.80                      | Unannotated        | 1.88 | 6.16–6.12                      | ATP                | 2.23 |
|                | 5.96–5.92                     | Unannotated        | 2.09 | 8.00–7.96                      | Unannotated        | 2.12 | 4.28–4.24                      | MA/Thr             | 1.88 | 1.32–1.28                      | Thr                | 2.14 |
|                | 1.84–1.80                     | Unannotated        | 1.97 | 4.28–4.24                      | MA/Thr             | 2.01 | 0.72–0.68                      | Unannotated        | 1.86 | 0.72–0.68                      | Unannotated        | 2.12 |
|                | 6.96–6.92                     | Unannotated        | 1.96 | 5.72–5.68                      | Unannotated        | 1.98 | 5.96–5.92                      | Unannotated        | 1.85 | 8.60–8.56                      | ATP                | 2.09 |
|                | 0.84–0.80                     | Unannotated        | 1.92 | 0.72–0.68                      | Unannotated        | 1.92 | 2.00–1.96                      | Ile/Pro            | 1.85 | 8.84–8.80                      | Trg                | 2.03 |
|                | 4.28–4.24                     | MA/Thr             | 1.91 | 1.84–1.80                      | Unannotated        | 1.89 | 2.44–2.40                      | Gln                | 1.85 | 0.84–0.80                      | Unannotated        | 1.97 |
|                | 0.72–0.68                     | Unannotated        | 1.86 | 2.00–1.96                      | Ile/Pro            | 1.86 | 5.08–5.04                      | Unannotated        | 1.80 | 1.36–1.32                      | Thr                | 1.92 |
|                | 2.00–1.96                     | Ile/Pro            | 1.86 | 6.96–6.92                      | Unannotated        | 1.86 | 2.64–2.60                      | Asp/MA             | 1.78 | 1.56–1.52                      | Unannotated        | 1.91 |
|                | 5.08–5.04                     | Unannotated        | 1.84 | 0.84–0.80                      | Unannotated        | 1.84 | 1.36–1.32                      | Thr                | 1.77 | 2.00–1.96                      | Ile/Pro            | 1.84 |
|                | 1.36–1.32                     | Thr                | 1.83 | 1.36–1.32                      | Thr                | 1.83 | 0.84–0.80                      | Unannotated        | 1.73 | 9.48–9.44                      | Unannotated        | 1.84 |

**Table S6.** NMR buckets with the highest PLS VIP values (rank 1–20) at the early growth stage.

|                    | Y Variable = DSIs at 3 August |                    |      | Y Variable = DSIs at 11 August |                    |      | Y Variable = DSIs at 17 August |                    |      | Y Variable = DSIs at 24 August |                    |      |
|--------------------|-------------------------------|--------------------|------|--------------------------------|--------------------|------|--------------------------------|--------------------|------|--------------------------------|--------------------|------|
|                    | Bucket (ppm)                  | Presumed Compounds | VIP  | Bucket (ppm)                   | Presumed Compounds | VIP  | Bucket (ppm)                   | Presumed Compounds | VIP  | Bucket (ppm)                   | Presumed Compounds | VIP  |
| Early growth stage | 3.00–2.96                     | GABA/Asn           | 2.52 | 3.00–2.96                      | GABA/Asn           | 2.55 | 3.00–2.96                      | GABA/Asn           | 2.44 | 3.00–2.96                      | GABA/Asn           | 2.60 |
|                    | 2.36–2.32                     | Glu/MA             | 2.33 | 2.44–2.40                      | Gln                | 2.36 | 2.44–2.40                      | Gln                | 2.27 | 2.44–2.40                      | Gln                | 2.45 |
|                    | 2.44–2.40                     | Gln                | 2.26 | 2.36–2.32                      | Glu/MA             | 2.33 | 2.36–2.32                      | Glu/MA             | 2.22 | 5.72–5.68                      | Unannotated        | 2.37 |
|                    | 8.00–7.96                     | Unannotated        | 2.13 | 5.72–5.68                      | Unannotated        | 2.18 | 2.32–2.28                      | GABA/Glu/Pro       | 2.17 | 2.36–2.32                      | Glu/MA             | 2.24 |
|                    | 2.32–2.28                     | GABA/Glu/Pro       | 2.12 | 2.32–2.28                      | GABA/Glu/Pro       | 2.13 | 2.28–2.24                      | GABA/Val           | 2.15 | 2.32–2.28                      | GABA/Glu/Pro       | 2.15 |
|                    | 2.28–2.24                     | GABA/Val           | 2.11 | 1.92–1.88                      | GABA/Acetate       | 2.12 | 5.04–5.00                      | Unannotated        | 2.13 | 2.28–2.24                      | GABA/Val           | 2.06 |
|                    | 5.04–5.00                     | Unannotated        | 2.10 | 2.28–2.24                      | GABA/Val           | 2.07 | 5.72–5.68                      | Unannotated        | 2.09 | 7.56–7.52                      | Trp                | 2.03 |
|                    | 1.92–1.88                     | GABA/Acetate       | 2.07 | 5.04–5.00                      | Unannotated        | 2.06 | 8.00–7.96                      | Unannotated        | 2.09 | 1.92–1.88                      | GABA/Acetate       | 2.02 |
|                    | 5.72–5.68                     | Unannotated        | 2.07 | 8.00–7.96                      | Unannotated        | 2.04 | 1.92–1.88                      | GABA/Acetate       | 2.03 | 5.04–5.00                      | Unannotated        | 2.01 |
|                    | 4.28–4.24                     | MA/Thr             | 1.95 | 2.12–2.08                      | Glu/Gln/Pro        | 1.92 | 3.04–3.00                      | GABA               | 1.96 | 8.00–7.96                      | Unannotated        | 1.95 |
|                    | 2.40–2.36                     | SA/MA              | 1.95 | 7.56–7.52                      | Trp                | 1.87 | 1.84–1.80                      | Unannotated        | 1.94 | 2.12–2.08                      | Glu/Gln/Pro        | 1.92 |
|                    | 6.96–6.92                     | Unannotated        | 1.89 | 1.84–1.80                      | Unannotated        | 1.87 | 2.12–2.08                      | Glu/Gln/Pro        | 1.94 | 1.56–1.52                      | Unannotated        | 1.87 |
|                    | 7.56–7.52                     | Trp                | 1.89 | 2.40–2.36                      | SA/MA              | 1.86 | 2.64–2.60                      | Asp/MA             | 1.91 | 2.40–2.36                      | SA/MA              | 1.80 |
|                    | 1.84–1.80                     | Unannotated        | 1.88 | 3.04–3.00                      | GABA               | 1.85 | 1.88–1.84                      | GABA               | 1.85 | 1.84–1.80                      | Unannotated        | 1.78 |
|                    | 2.64–2.60                     | Asp/MA             | 1.86 | 4.28–4.24                      | MA/Thr             | 1.83 | 6.36–6.32                      | Unannotated        | 1.83 | 1.88–1.84                      | GABA               | 1.77 |
|                    | 4.32–4.28                     | MA                 | 1.85 | 1.56–1.52                      | Unannotated        | 1.83 | 0.96–0.92                      | Ile/Leu            | 1.82 | 2.16–2.12                      | Glu/Gln            | 1.76 |
|                    | 1.88–1.84                     | GABA               | 1.83 | 6.96–6.92                      | Unannotated        | 1.79 | 2.16–2.12                      | Glu/Gln            | 1.82 | 2.48–2.44                      | Gln                | 1.73 |
|                    | 2.12–2.08                     | Glu/Gln/Pro        | 1.83 | 2.64–2.60                      | Asp/MA             | 1.78 | 7.56–7.52                      | Trp                | 1.79 | 1.32–1.28                      | Thr                | 1.72 |
|                    | 6.36–6.32                     | Unannotated        | 1.81 | 1.88–1.84                      | GABA               | 1.77 | 6.96–6.92                      | Unannotated        | 1.79 | 3.04–3.00                      | GABA               | 1.72 |
|                    | 3.04–3.00                     | GABA               | 1.80 | 0.96–0.92                      | Ile/Leu            | 1.75 | 2.48–2.44                      | Gln                | 1.77 | 6.96–6.92                      | Unannotated        | 1.71 |

**Table S7.** NMR buckets with the highest PLS VIP values (rank 1–20) at the root-enlargement stage.

|                        | Y Variable = DSIs at 3 August |                    |      | Y Variable = DSIs at 11 August |                    |      | Y Variable = DSIs at 17 August |                    |      | Y Variable = DSIs at 24 August |                    |      |
|------------------------|-------------------------------|--------------------|------|--------------------------------|--------------------|------|--------------------------------|--------------------|------|--------------------------------|--------------------|------|
|                        | Bucket (ppm)                  | Presumed Compounds | VIP  | Bucket (ppm)                   | Presumed Compounds | VIP  | Bucket (ppm)                   | Presumed Compounds | VIP  | Bucket (ppm)                   | Presumed Compounds | VIP  |
| Root-enlargement stage | 5.04–5.00                     | Unannotated        | 2.79 | 5.04–5.00                      | Unannotated        | 2.75 | 5.04–5.00                      | Unannotated        | 2.79 | 5.04–5.00                      | Unannotated        | 2.63 |
|                        | 8.00–7.96                     | Unannotated        | 2.40 | 5.72–5.68                      | Unannotated        | 2.40 | 8.00–7.96                      | Unannotated        | 2.39 | 5.72–5.68                      | Unannotated        | 2.63 |
|                        | 2.44–2.40                     | Gln                | 2.19 | 8.00–7.96                      | Unannotated        | 2.34 | 6.80–6.76                      | Unannotated        | 2.29 | 8.00–7.96                      | Unannotated        | 2.30 |
|                        | 5.72–5.68                     | Unannotated        | 2.18 | 2.44–2.40                      | Gln                | 2.31 | 2.44–2.40                      | Gln                | 2.24 | 2.44–2.40                      | Gln                | 2.29 |
|                        | 6.80–6.76                     | Unannotated        | 2.10 | 2.12–2.08                      | Glu/Gln/Pro        | 2.18 | 5.72–5.68                      | Unannotated        | 2.24 | 3.12–3.08                      | Ethanolamine       | 2.24 |
|                        | 3.12–3.08                     | Ethanolamine       | 2.10 | 3.12–3.08                      | Ethanolamine       | 2.16 | 2.12–2.08                      | Glu/Gln/Pro        | 2.13 | 3.04–3.00                      | GABA               | 2.14 |
|                        | 3.04–3.00                     | GABA               | 2.09 | 6.80–6.76                      | Unannotated        | 2.11 | 2.16–2.12                      | Glu/Gln            | 2.05 | 2.12–2.08                      | Glu/Gln/Pro        | 2.10 |
|                        | 2.12–2.08                     | Glu/Gln/Pro        | 2.06 | 3.04–3.00                      | GABA               | 2.10 | 3.04–3.00                      | GABA               | 2.02 | 3.00–2.96                      | GABA/Asn           | 2.09 |
|                        | 2.16–2.12                     | Glu/Gln            | 1.99 | 2.16–2.12                      | Glu/Gln            | 2.08 | 3.12–3.08                      | Ethanolamine       | 2.02 | 1.36–1.32                      | Thr                | 2.07 |
|                        | 2.48–2.44                     | Gln                | 1.89 | 2.48–2.44                      | Gln                | 1.97 | 2.48–2.44                      | Gln                | 1.95 | 2.16–2.12                      | Glu/Gln            | 2.01 |
|                        | 1.84–1.80                     | Unannotated        | 1.87 | 2.36–2.32                      | Glu/MA             | 1.86 | 1.84–1.80                      | Unannotated        | 1.95 | 6.80–6.76                      | Unannotated        | 1.97 |
|                        | 1.28–1.24                     | Ile                | 1.85 | 1.28–1.24                      | Ile                | 1.85 | 2.36–2.32                      | Glu/MA             | 1.87 | 2.32–2.28                      | GABA/Glu/Pro       | 1.94 |
|                        | 2.36–2.32                     | Glu/MA             | 1.84 | 1.84–1.80                      | Unannotated        | 1.83 | 1.28–1.24                      | Ile                | 1.83 | 1.28–1.24                      | Ile                | 1.93 |
|                        | 6.88–6.84                     | Tyr                | 1.84 | 3.00–2.96                      | GABA/Asn           | 1.83 | 6.88–6.84                      | Tyr                | 1.80 | 2.48–2.44                      | Gln                | 1.89 |
|                        | 2.72–2.68                     | CA/MA/Asp          | 1.81 | 6.88–6.84                      | Tyr                | 1.77 | 2.68–2.64                      | CA/MA/Asp          | 1.78 | 2.36–2.32                      | Glu/MA             | 1.88 |
|                        | 2.68–2.64                     | CA/MA/Asp          | 1.80 | 2.32–2.28                      | GABA/Glu/Pro       | 1.76 | 3.00–2.96                      | GABA/Asn           | 1.74 | 2.28–2.24                      | GABA/Val           | 1.81 |
|                        | 3.00–2.96                     | GABA/Asn           | 1.77 | 1.36–1.32                      | Thr                | 1.70 | 4.72–4.68                      | Unannotated        | 1.72 | 1.40–1.36                      | Unannotated        | 1.81 |
|                        | 2.32–2.28                     | GABA/Glu/Pro       | 1.75 | 2.04–2.00                      | Glu/Pro            | 1.68 | 2.32–2.28                      | GABA/Glu/Pro       | 1.71 | 1.32–1.28                      | Thr                | 1.80 |
|                        | 1.12–1.08                     | Unannotated        | 1.74 | 2.28–2.24                      | GABA/Val           | 1.67 | 2.72–2.68                      | CA/MA/Asp          | 1.69 | 2.68–2.64                      | CA/MA/Asp          | 1.71 |
|                        | 2.28–2.24                     | GABA/Val           | 1.65 | 1.48–1.44                      | Ala                | 1.66 | 8.16–8.12                      | Unannotated        | 1.69 | 2.80–2.76                      | Asp                | 1.66 |

**Table S8.** NMR buckets with the highest PLS VIP values (rank 1–20) at the disease-development stage.

|                           | Y Variable = DSIs at 3 August |                    |      | Y Variable = DSIs at 11 August |                    |      | Y Variable = DSIs at 17 August |                    |      | Y Variable = DSIs at 24 August |                    |      |
|---------------------------|-------------------------------|--------------------|------|--------------------------------|--------------------|------|--------------------------------|--------------------|------|--------------------------------|--------------------|------|
|                           | Bucket (ppm)                  | Presumed Compounds | VIP  | Bucket (ppm)                   | Presumed Compounds | VIP  | Bucket (ppm)                   | Presumed Compounds | VIP  | Bucket (ppm)                   | Presumed Compounds | VIP  |
| Disease-development stage | 3.96–3.92                     | Unannotated        | 3.05 | 3.96–3.92                      | Unannotated        | 2.94 | 3.96–3.92                      | Unannotated        | 3.02 | 3.96–3.92                      | Unannotated        | 2.78 |
|                           | 8.00–7.96                     | Unannotated        | 2.79 | 3.60–3.56                      | Suc/Fru            | 2.66 | 8.00–7.96                      | Unannotated        | 2.75 | 3.60–3.56                      | Suc/Fru            | 2.64 |
|                           | 3.60–3.56                     | Suc/Fru            | 2.58 | 8.00–7.96                      | Unannotated        | 2.59 | 3.60–3.56                      | Suc/Fru            | 2.68 | 8.00–7.96                      | Unannotated        | 2.58 |
|                           | 1.12–1.08                     | Unannotated        | 2.50 | 1.28–1.24                      | Ile                | 2.51 | 4.04–4.00                      | Suc/Fru            | 2.47 | 4.04–4.00                      | Suc/Fru            | 2.41 |
|                           | 1.28–1.24                     | Ile                | 2.49 | 4.04–4.00                      | Suc/Fru            | 2.46 | 4.00–3.96                      | Fru                | 2.46 | 4.00–3.96                      | Fru                | 2.33 |
|                           | 4.04–4.00                     | Suc/Fru            | 2.35 | 4.00–3.96                      | Fru                | 2.44 | 1.12–1.08                      | Unannotated        | 2.43 | 4.12–4.08                      | Fru                | 2.32 |
|                           | 4.00–3.96                     | Fru                | 2.34 | 1.12–1.08                      | Unannotated        | 2.43 | 1.28–1.24                      | Ile                | 2.42 | 1.28–1.24                      | Ile                | 2.27 |
|                           | 4.12–4.08                     | Fru                | 2.30 | 4.12–4.08                      | Fru                | 2.39 | 4.12–4.08                      | Fru                | 2.41 | 3.04–3.00                      | GABA               | 2.25 |
|                           | 3.04–3.00                     | GABA               | 2.14 | 3.04–3.00                      | GABA               | 2.23 | 3.04–3.00                      | GABA               | 2.20 | 1.20–1.16                      | Unannotated        | 2.19 |
|                           | 4.16–4.12                     | Unannotated        | 2.13 | 2.28–2.24                      | GABA/Val           | 2.04 | 1.20–1.16                      | Unannotated        | 2.08 | 2.12–2.08                      | Glu/Gln/Pro        | 2.14 |
|                           | 1.32–1.28                     | Thr                | 2.12 | 4.16–4.12                      | Unannotated        | 2.02 | 4.16–4.12                      | Unannotated        | 2.08 | 1.12–1.08                      | Unannotated        | 2.13 |
|                           | 2.28–2.24                     | GABA/Val           | 2.02 | 1.20–1.16                      | Unannotated        | 1.99 | 6.00–5.96                      | Unannotated        | 2.00 | 1.32–1.28                      | Thr                | 2.09 |
|                           | 5.04–5.00                     | Unannotated        | 1.99 | 2.12–2.08                      | Glu/Gln/Pro        | 1.95 | 7.16–7.12                      | Unannotated        | 1.99 | 2.28–2.24                      | GABA/Val           | 2.02 |
|                           | 1.20–1.16                     | Unannotated        | 1.97 | 1.32–1.28                      | Thr                | 1.91 | 5.04–5.00                      | Unannotated        | 1.97 | 4.16–4.12                      | Unannotated        | 2.01 |
|                           | 1.36–1.32                     | Thr                | 1.96 | 1.40–1.36                      | Unannotated        | 1.90 | 2.28–2.24                      | GABA/Val           | 1.97 | 5.52–5.48                      | Unannotated        | 2.00 |
|                           | 6.00–5.96                     | Unannotated        | 1.94 | 6.00–5.96                      | Unannotated        | 1.88 | 2.12–2.08                      | Glu/Gln/Pro        | 1.93 | 2.16–2.12                      | Glu/Gln            | 1.98 |
|                           | 7.16–7.12                     | Unannotated        | 1.89 | 7.16–7.12                      | Unannotated        | 1.85 | 1.32–1.28                      | Thr                | 1.91 | 2.36–2.32                      | Glu/MA             | 1.97 |
|                           | 2.12–2.08                     | Glu/Gln/Pro        | 1.87 | 1.36–1.32                      | Thr                | 1.84 | 1.40–1.36                      | Unannotated        | 1.87 | 1.36–1.32                      | Thr                | 1.95 |
|                           | 7.04–7.00                     | Unannotated        | 1.87 | 2.32–2.28                      | GABA/Glu/Pro       | 1.84 | 5.52–5.48                      | Unannotated        | 1.86 | 6.00–5.96                      | Unannotated        | 1.94 |
|                           | 1.40–1.36                     | Unannotated        | 1.87 | 8.76–8.72                      | Unannotated        | 1.84 | 7.04–7.00                      | Unannotated        | 1.86 | 2.32–2.28                      | GABA/Glu/Pro       | 1.92 |

**Table S9.** NMR buckets with the highest OPLS VIP values (rank 1–20) at the seedling stage.

|                | Y Variable = DSIs at 3 August |                    |      | Y Variable = DSIs at 11 August |                    |      | Y Variable = DSIs at 17 August |                    |      | Y Variable = DSIs at 24 August |                    |      |
|----------------|-------------------------------|--------------------|------|--------------------------------|--------------------|------|--------------------------------|--------------------|------|--------------------------------|--------------------|------|
|                | Bucket (ppm)                  | Presumed Compounds | VIP  | Bucket (ppm)                   | Presumed Compounds | VIP  | Bucket (ppm)                   | Presumed Compounds | VIP  | Bucket (ppm)                   | Presumed Compounds | VIP  |
| Seedling stage | 6.24–6.20                     | Unannotated        | 2.27 | 6.24–6.20                      | Unannotated        | 2.25 | 6.24–6.20                      | Unannotated        | 2.21 | 5.04–5.00                      | Unannotated        | 2.46 |
|                | 5.04–5.00                     | Unannotated        | 2.17 | 6.16–6.12                      | ATP                | 2.10 | 5.04–5.00                      | Unannotated        | 2.18 | 6.24–6.20                      | Unannotated        | 2.33 |
|                | 3.96–3.92                     | Unannotated        | 2.07 | 5.04–5.00                      | Unannotated        | 2.06 | 3.96–3.92                      | Unannotated        | 2.02 | 3.96–3.92                      | Unannotated        | 2.27 |
|                | 6.16–6.12                     | ATP                | 2.06 | 3.96–3.92                      | Unannotated        | 2.01 | 8.00–7.96                      | Unannotated        | 1.91 | 8.00–7.96                      | Unannotated        | 2.12 |
|                | 8.00–7.96                     | Unannotated        | 1.89 | 8.60–8.56                      | ATP                | 1.87 | 6.16–6.12                      | ATP                | 1.88 | 0.72–0.68                      | Unannotated        | 2.06 |
|                | 8.60–8.56                     | ATP                | 1.79 | 4.28–4.24                      | MA/Thr             | 1.78 | 1.32–1.28                      | Thr                | 1.83 | 5.08–5.04                      | Unannotated        | 2.05 |
|                | 0.72–0.68                     | Unannotated        | 1.77 | 8.00–7.96                      | Unannotated        | 1.78 | 2.44–2.40                      | Gln                | 1.80 | 6.16–6.12                      | ATP                | 1.96 |
|                | 6.76–6.72                     | Unannotated        | 1.73 | 0.72–0.68                      | Unannotated        | 1.77 | 4.28–4.24                      | MA/Thr             | 1.78 | 0.16–0.12                      | Unannotated        | 1.94 |
|                | 9.48–9.44                     | Unannotated        | 1.73 | 0.16–0.12                      | Unannotated        | 1.76 | 0.72–0.68                      | Unannotated        | 1.77 | 9.28–9.24                      | Unannotated        | 1.91 |
|                | 0.16–0.12                     | Unannotated        | 1.73 | 1.32–1.28                      | Thr                | 1.73 | 6.76–6.72                      | Unannotated        | 1.75 | 5.72–5.68                      | Unannotated        | 1.88 |
|                | 0.84–0.80                     | Unannotated        | 1.71 | 2.44–2.40                      | Gln                | 1.72 | 2.64–2.600                     | Asp/MA             | 1.73 | 5.96–5.92                      | Unannotated        | 1.88 |
|                | 1.32–1.28                     | Thr                | 1.69 | 5.96–5.92                      | Unannotated        | 1.70 | 2.00–1.96                      | Ile/Pro            | 1.73 | 1.32–1.28                      | Thr                | 1.80 |
|                | 4.28–4.24                     | MA/Thr             | 1.66 | 0.84–0.80                      | Unannotated        | 1.69 | 1.84–1.800                     | Unannotated        | 1.69 | 6.76–6.72                      | Unannotated        | 1.77 |
|                | 6.96–6.92                     | Unannotated        | 1.66 | 9.48–9.44                      | Unannotated        | 1.68 | 9.28–9.24                      | Unannotated        | 1.69 | 8.60–8.56                      | ATP                | 1.76 |
|                | 9.28–9.24                     | Unannotated        | 1.64 | 2.64–2.60                      | Asp/MA             | 1.68 | 0.16–0.12                      | Unannotated        | 1.68 | 9.48–9.44                      | Unannotated        | 1.75 |
|                | 5.96–5.92                     | Unannotated        | 1.63 | 5.72–5.68                      | Unannotated        | 1.67 | 1.36–1.32                      | Thr                | 1.68 | 1.56–1.52                      | Unannotated        | 1.74 |
|                | 1.36–1.32                     | Thr                | 1.63 | 6.76–6.72                      | Unannotated        | 1.66 | 0.84–0.8                       | Unannotated        | 1.64 | 0.84–0.8                       | Unannotated        | 1.70 |
|                | 2.68–2.64                     | CA/MA/Asp          | 1.62 | 9.28–9.24                      | Unannotated        | 1.66 | 9.48–9.44                      | Unannotated        | 1.61 | 2.00–1.96                      | Ile/Pro            | 1.69 |
|                | 2.00–1.96                     | Ile/Pro            | 1.61 | 2.00–1.96                      | Ile/Pro            | 1.65 | 8.6–8.56                       | ATP                | 1.61 | 6.68–6.64                      | Unannotated        | 1.66 |
|                | 7.04–7.00                     | Unannotated        | 1.60 | 1.36–1.32                      | Thr                | 1.62 | 6.96–6.92                      | Unannotated        | 1.61 | 6.96–6.92                      | Unannotated        | 1.65 |



**Table S10.** NMR buckets with the highest OPLS VIP values (rank 1–20) at the early growth stage.

|                    | Y Variable = DSIs at 3 August |                    |      | Y Variable = DSIs at 11 August |                    |      | Y Variable = DSIs at 17 August |                    |      | Y Variable = DSIs at 24 August |                    |      |
|--------------------|-------------------------------|--------------------|------|--------------------------------|--------------------|------|--------------------------------|--------------------|------|--------------------------------|--------------------|------|
|                    | Bucket (ppm)                  | Presumed Compounds | VIP  | Bucket (ppm)                   | Presumed Compounds | VIP  | Bucket (ppm)                   | Presumed Compounds | VIP  | Bucket (ppm)                   | Presumed Compounds | VIP  |
| Early growth stage | 3.00–2.96                     | GABA/Asn           | 2.11 | 3.00–2.96                      | GABA/Asn           | 2.14 | 3.00–2.96                      | GABA/Asn           | 2.14 | 3.00–2.96                      | GABA/Asn           | 2.29 |
|                    | 2.44–2.40                     | Gln                | 1.97 | 2.44–2.40                      | Gln                | 2.04 | 2.28–2.24                      | GABA/Val           | 2.03 | 2.44–2.40                      | Gln                | 2.28 |
|                    | 2.32–2.28                     | GABA/Glu/Pro       | 1.93 | 2.32–2.28                      | GABA/Glu/Pro       | 1.94 | 8.00–7.96                      | Unannotated        | 2.01 | 2.28–2.24                      | GABA/Val           | 2.11 |
|                    | 2.36–2.32                     | Glu/MA             | 1.92 | 2.36–2.32                      | Glu/MA             | 1.91 | 2.32–2.28                      | GABA/Glu/Pro       | 1.99 | 2.32–2.28                      | GABA/Glu/Pro       | 2.11 |
|                    | 2.28–2.24                     | GABA/Val           | 1.90 | 2.28–2.24                      | GABA/Val           | 1.87 | 5.04–5.00                      | Unannotated        | 1.97 | 3.76–3.72                      | Suc/Glc/Glu/Gln    | 2.01 |
|                    | 8.00–7.96                     | Unannotated        | 1.84 | 1.92–1.88                      | GABA/Acetate       | 1.86 | 2.44–2.40                      | Gln                | 1.97 | 2.48–2.44                      | Gln                | 2.00 |
|                    | 1.92–1.88                     | GABA/Acetate       | 1.82 | 8.00–7.96                      | Unannotated        | 1.79 | 2.36–2.32                      | Glu/MA             | 1.92 | 3.40–3.36                      | Glc                | 1.97 |
|                    | 5.04–5.00                     | Unannotated        | 1.78 | 3.04–3.00                      | GABA               | 1.76 | 1.88–1.84                      | GABA               | 1.86 | 2.16–2.12                      | Glu/Gln            | 1.95 |
|                    | 3.04–3.00                     | GABA               | 1.75 | 5.04–5.00                      | Unannotated        | 1.75 | 1.92–1.88                      | GABA/Acetate       | 1.79 | 3.48–3.44                      | Suc/Glc            | 1.95 |
|                    | 1.88–1.84                     | GABA               | 1.73 | 3.76–3.72                      | Suc/Glc/Glu/Gln    | 1.73 | 2.64–2.600                     | Asp/MA             | 1.78 | 5.24–5.20                      | Glc                | 1.94 |
|                    | 2.64–2.600                    | Asp/MA             | 1.73 | 2.12–2.08                      | Glu/Gln/Pro        | 1.72 | 6.96–6.92                      | Unannotated        | 1.76 | 2.40–2.36                      | SA/MA              | 1.92 |
|                    | 4.28–4.24                     | MA/Thr             | 1.71 | 2.48–2.44                      | Gln                | 1.71 | 2.40–2.36                      | SA/MA              | 1.75 | 3.44–3.40                      | Suc/Glc            | 1.91 |
|                    | 2.40–2.36                     | SA/MA              | 1.70 | 1.88–1.84                      | GABA               | 1.70 | 4.28–4.24                      | MA/Thr             | 1.75 | 2.64–2.600                     | Asp/MA             | 1.91 |
|                    | 3.76–3.72                     | Suc/Glc/Glu/Gln    | 1.69 | 2.16–2.12                      | Glu/Gln            | 1.69 | 2.68–2.64                      | CA/MA/Asp          | 1.73 | 1.88–1.84                      | GABA               | 1.91 |
|                    | 4.32–4.28                     | MA                 | 1.69 | 5.72–5.68                      | Unannotated        | 1.69 | 7.04–7.00                      | Unannotated        | 1.72 | 4.28–4.24                      | MA/Thr             | 1.90 |
|                    | 2.48–2.44                     | Gln                | 1.68 | 2.64–2.60                      | Asp/MA             | 1.67 | 4.32–4.28                      | MA                 | 1.71 | 4.64–4.60                      | Glc                | 1.88 |
|                    | 2.12–2.08                     | Glu/Gln/Pro        | 1.67 | 2.40–2.36                      | SA/MA              | 1.65 | 2.48–2.44                      | Gln                | 1.70 | 3.52–3.48                      | Glc                | 1.86 |
|                    | 2.68–2.64                     | CA/MA/Asp          | 1.67 | 4.28–4.24                      | MA/Thr             | 1.64 | 5.72–5.68                      | Unannotated        | 1.69 | 1.92–1.88                      | GABA/Acetate       | 1.82 |
|                    | 2.16–2.12                     | Glu/Gln            | 1.67 | 4.32–4.28                      | MA                 | 1.63 | 1.84–1.80                      | Unannotated        | 1.68 | 2.12–2.08                      | Glu/Gln/Pro        | 1.82 |
|                    | 7.04–7.00                     | Unannotated        | 1.66 | 6.52–6.48                      | Fumarate           | 1.60 | 2.16–2.12                      | Glu/Gln            | 1.68 | 3.84–3.8                       | Suc/Glc/Fru        | 1.81 |

**Table S11.** NMR buckets with the highest OPLS VIP values (rank 1–20) at the root-enlargement stage.

|                        | Y Variable = DSIs at 3 August |                    |      | Y Variable = DSIs at 11 August |                    |      | Y Variable = DSIs at 17 August |                    |      | Y Variable = DSIs at 24 August |                    |      |
|------------------------|-------------------------------|--------------------|------|--------------------------------|--------------------|------|--------------------------------|--------------------|------|--------------------------------|--------------------|------|
|                        | Bucket (ppm)                  | Presumed Compounds | VIP  | Bucket (ppm)                   | Presumed Compounds | VIP  | Bucket (ppm)                   | Presumed Compounds | VIP  | Bucket (ppm)                   | Presumed Compounds | VIP  |
| Root-enlargement stage | 5.04–5.00                     | Unannotated        | 2.50 | 5.04–5.00                      | Unannotated        | 2.48 | 5.04–5.00                      | Unannotated        | 2.49 | 5.04–5.00                      | Unannotated        | 2.40 |
|                        | 8.00–7.96                     | Unannotated        | 2.16 | 2.44–2.40                      | Gln                | 2.22 | 8.00–7.96                      | Unannotated        | 2.18 | 2.44–2.40                      | Gln                | 2.25 |
|                        | 2.44–2.40                     | Gln                | 2.15 | 8.00–7.96                      | Unannotated        | 2.15 | 2.44–2.40                      | Gln                | 2.12 | 3.04–3.00                      | GABA               | 2.24 |
|                        | 3.04–3.00                     | GABA               | 2.10 | 3.04–3.00                      | GABA               | 2.14 | 3.04–3.00                      | GABA               | 2.09 | 2.32–2.28                      | GABA/Glu/Pro       | 2.19 |
|                        | 2.16–2.12                     | Glu/Gln            | 2.04 | 2.16–2.12                      | Glu/Gln            | 2.11 | 2.16–2.12                      | Glu/Gln            | 2.03 | 3.00–2.96                      | GABA/Asn           | 2.16 |
|                        | 2.32–2.28                     | GABA/Glu/Pro       | 2.01 | 2.48–2.44                      | Gln                | 2.05 | 2.32–2.28                      | GABA/Glu/Pro       | 2.00 | 2.16–2.12                      | Glu/Gln            | 2.12 |
|                        | 2.48–2.44                     | Gln                | 1.99 | 2.32–2.28                      | GABA/Glu/Pro       | 2.05 | 2.48–2.44                      | Gln                | 1.98 | 8.00–7.96                      | Unannotated        | 2.12 |
|                        | 3.00–2.96                     | GABA/Asn           | 1.95 | 3.00–2.96                      | GABA/Asn           | 2.00 | 6.80–6.76                      | Unannotated        | 1.95 | 2.48–2.44                      | Gln                | 2.07 |
|                        | 6.80–6.76                     | Unannotated        | 1.90 | 2.12–2.08                      | Glu/Gln/Pro        | 1.97 | 3.00–2.96                      | GABA/Asn           | 1.93 | 2.28–2.24                      | GABA/Val           | 2.02 |
|                        | 2.12–2.08                     | Glu/Gln/Pro        | 1.90 | 2.28–2.24                      | GABA/Val           | 1.89 | 3.76–3.72                      | Suc/Glc/Glu/Gln    | 1.91 | 3.76–3.72                      | Suc/Glc/Glu/Gln    | 2.01 |
|                        | 2.68–2.64                     | CA/MA/Asp          | 1.90 | 6.80–6.76                      | Unannotated        | 1.88 | 2.12–2.08                      | Glu/Gln/Pro        | 1.88 | 1.36–1.32                      | Thr                | 1.96 |
|                        | 2.28–2.24                     | GABA/Val           | 1.85 | 3.76–3.72                      | Suc/Glc/Glu/Gln    | 1.87 | 2.68–2.64                      | CA/MA/Asp          | 1.88 | 2.12–2.08                      | Glu/Gln/Pro        | 1.95 |
|                        | 3.76–3.72                     | Suc/Glc/Glu/Gln    | 1.84 | 2.68–2.64                      | CA/MA/Asp          | 1.85 | 2.28–2.24                      | GABA/Val           | 1.85 | 1.88–1.84                      | GABA               | 1.88 |
|                        | 1.48–1.44                     | Ala                | 1.80 | 1.48–1.44                      | Ala                | 1.82 | 1.48–1.44                      | Ala                | 1.81 | 3.48–3.44                      | Suc/Glc            | 1.86 |
|                        | 6.68–6.64                     | Unannotated        | 1.78 | 3.12–3.08                      | Ethanolamine       | 1.78 | 6.68–6.64                      | Unannotated        | 1.77 | 2.68–2.64                      | CA/MA/Asp          | 1.84 |
|                        | 2.72–2.68                     | CA/MA/Asp          | 1.78 | 2.56–2.52                      | CA                 | 1.77 | 3.48–3.44                      | Suc/Glc            | 1.77 | 3.12–3.08                      | Ethanolamine       | 1.83 |
|                        | 2.56–2.52                     | CA                 | 1.78 | 2.72–2.68                      | CA/MA/Asp          | 1.75 | 2.56–2.52                      | CA                 | 1.74 | 4.68–4.64                      | Glc                | 1.82 |
|                        | 3.12–3.08                     | Ethanolamine       | 1.72 | 1.36–1.32                      | Thr                | 1.74 | 6.64–6.60                      | Unannotated        | 1.74 | 1.48–1.44                      | Ala                | 1.82 |
|                        | 6.64–6.60                     | Unannotated        | 1.71 | 3.48–3.44                      | Suc/Glc            | 1.72 | 4.68–4.64                      | Glc                | 1.74 | 1.32–1.28                      | Thr                | 1.81 |
|                        | 1.64–1.60                     | Unannotated        | 1.69 | 6.68–6.64                      | Unannotated        | 1.71 | 2.72–2.68                      | CA/MA/Asp          | 1.72 | 3.40–3.36                      | Glc                | 1.81 |

**Table S12.** NMR buckets with the highest OPLS VIP values (rank 1–20) at the disease-development stage.

|                           | Y Variable = DSIs at 3 August |                    |      | Y Variable = DSIs at 11 August |                    |      | Y Variable = DSIs at 17 August |                    |      | Y Variable = DSIs at 24 August |                    |      |
|---------------------------|-------------------------------|--------------------|------|--------------------------------|--------------------|------|--------------------------------|--------------------|------|--------------------------------|--------------------|------|
|                           | Bucket (ppm)                  | Presumed Compounds | VIP  | Bucket (ppm)                   | Presumed Compounds | VIP  | Bucket (ppm)                   | Presumed Compounds | VIP  | Bucket (ppm)                   | Presumed Compounds | VIP  |
| Disease-development stage | 3.96–3.92                     | Unannotated        | 2.62 | 3.96–3.92                      | Unannotated        | 2.53 | 3.96–3.92                      | Unannotated        | 2.59 | 3.96–3.92                      | Unannotated        | 2.36 |
|                           | 3.60–3.56                     | Suc/Fru            | 2.38 | 3.60–3.56                      | Suc/Fru            | 2.46 | 3.60–3.56                      | Suc/Fru            | 2.45 | 3.60–3.56                      | Suc/Fru            | 2.34 |
|                           | 8.00–7.96                     | Unannotated        | 2.34 | 4.00–3.96                      | Fru                | 2.37 | 4.00–3.96                      | Fru                | 2.40 | 4.00–3.96                      | Fru                | 2.27 |
|                           | 4.00–3.96                     | Fru                | 2.31 | 4.04–4.00                      | Suc/Fru            | 2.33 | 4.12–4.08                      | Fru                | 2.35 | 4.12–4.08                      | Fru                | 2.24 |
|                           | 4.12–4.08                     | Fru                | 2.26 | 4.12–4.08                      | Fru                | 2.32 | 4.04–4.00                      | Suc/Fru            | 2.34 | 4.04–4.00                      | Suc/Fru            | 2.22 |
|                           | 1.12–1.08                     | Unannotated        | 2.26 | 8.00–7.96                      | Unannotated        | 2.22 | 8.00–7.96                      | Unannotated        | 2.32 | 8.00–7.96                      | Unannotated        | 2.14 |
|                           | 4.04–4.00                     | Suc/Fru            | 2.24 | 1.12–1.08                      | Unannotated        | 2.19 | 1.12–1.08                      | Unannotated        | 2.21 | 1.12–1.08                      | Unannotated        | 2.02 |
|                           | 4.16–4.12                     | Unannotated        | 2.12 | 1.28–1.24                      | Ile                | 2.11 | 4.16–4.12                      | Unannotated        | 2.09 | 3.04–3.00.00                   | GABA               | 1.99 |
|                           | 1.28–1.24                     | Ile                | 2.08 | 3.80–3.76                      | Suc/Glc/Fru        | 2.05 | 1.28–1.24                      | Ile                | 2.06 | 4.16–4.12                      | Unannotated        | 1.98 |
|                           | 3.80–3.76                     | Suc/Glc/Fru        | 1.99 | 4.16–4.12                      | Unannotated        | 2.04 | 3.80–3.76                      | Suc/Glc/Fru        | 2.04 | 2.12–2.08                      | Glu/Gln/Pro        | 1.97 |
|                           | 1.40–1.36                     | Unannotated        | 1.93 | 3.56–3.52                      | Suc/Glc/Fru        | 1.94 | 1.40–1.36                      | Unannotated        | 1.92 | 1.28–1.24                      | Ile                | 1.94 |
|                           | 2.12–2.08                     | Glu/Gln/Pro        | 1.88 | 1.40–1.36                      | Unannotated        | 1.91 | 3.56–3.52                      | Suc/Glc/Fru        | 1.90 | 2.16–2.12                      | Glu/Gln            | 1.91 |
|                           | 3.56–3.52                     | Suc/Glc/Fru        | 1.86 | 2.12–2.08                      | Glu/Gln/Pro        | 1.90 | 3.04–3.00                      | GABA               | 1.87 | 3.80–3.76                      | Suc/Glc/Fru        | 1.90 |
|                           | 2.16–2.12                     | Glu/Gln            | 1.83 | 3.04–3.00                      | GABA               | 1.88 | 2.12–2.08                      | Glu/Gln/Pro        | 1.87 | 1.40–1.36                      | Unannotated        | 1.88 |
|                           | 3.04–3.00                     | GABA               | 1.83 | 2.16–2.12                      | Glu/Gln            | 1.86 | 2.16–2.12                      | Glu/Gln            | 1.83 | 2.28–2.24                      | GABA/Val           | 1.79 |
|                           | 1.36–1.32                     | Thr                | 1.76 | 3.72–3.68                      | Glc/Fru            | 1.75 | 5.04–5.00                      |                    | 1.75 | 2.32–2.28                      | GABA/Glu/Pro       | 1.79 |
|                           | 1.32–1.28                     | Thr                | 1.76 | 2.44–2.40                      | Gln                | 1.69 | 3.72–3.68                      | Glc/Fru            | 1.74 | 3.56–3.52                      | Suc/Glc/Fru        | 1.79 |
|                           | 5.04–5.00                     | Unannotated        | 1.75 | 2.48–2.44                      | Gln                | 1.69 | 1.36–1.32                      | Thr                | 1.69 | 2.44–2.40                      | Gln                | 1.78 |
|                           | 3.72–3.68                     | Glc/Fru            | 1.73 | 1.36–1.32                      | Thr                | 1.68 | 7.04–7.00                      | Unannotated        | 1.67 | 1.48–1.44                      | Ala                | 1.75 |
|                           | 7.04–7.00                     | Unannotated        | 1.70 | 2.28–2.24                      | GABA/Val           | 1.66 | 2.28–2.24                      | GABA/Val           | 1.66 | 1.36–1.32                      | Thr                | 1.75 |

**Table S13.** Pearson's correlation coefficient between the original intensity of NMR buckets (normalized to the intensity of DSS) and DSIs. The buckets with  $|r| > 0.5$  are listed.

| Growth Stage       | Y Variable = DSIs on 4 August |                    |          | Y Variable = DSIs on 11 August |                    |          | Y Variable = DSIs on 17 August |                    |          | Y Variable = DSIs on 24 August |                    |          |
|--------------------|-------------------------------|--------------------|----------|--------------------------------|--------------------|----------|--------------------------------|--------------------|----------|--------------------------------|--------------------|----------|
|                    | Bucket (ppm)                  | Presumed Compounds | <i>r</i> | Bucket (ppm)                   | Presumed Compounds | <i>r</i> | Bucket (ppm)                   | Presumed Compounds | <i>r</i> | Bucket (ppm)                   | Presumed Compounds | <i>r</i> |
| Seedling stage     | 6.24–6.20                     | Unannotated        | 0.55     | 9.28–9.24                      | Unannotated        | 0.53     | 9.28–9.24                      | Unannotated        | 0.54     | 5.04–5.00                      | Unannotated        | 0.54     |
|                    | 5.04–5.00                     | Unannotated        | 0.55     | 6.24–6.20                      | Unannotated        | 0.52     | 5.04–5.00                      | Unannotated        | 0.53     | 3.96–3.92                      | Unannotated        | 0.52     |
|                    | 3.96–3.92                     | Unannotated        | 0.55     | 3.96–3.92                      | Unannotated        | 0.52     | 3.96–3.92                      | Unannotated        | 0.52     | 5.96–5.92                      | Unannotated        | −0.51    |
|                    | 9.28–9.24                     | Unannotated        | 0.53     |                                | Unannotated        |          | 6.76–6.72                      | Unannotated        | 0.52     | 0.16–0.12                      | Unannotated        | −0.52    |
|                    | 6.76–6.72                     | Unannotated        | 0.51     | 6.16–6.12                      | ATP                | −0.52    | 6.24–6.20                      | Unannotated        | 0.52     |                                |                    |          |
|                    | 8.00–7.96                     | Unannotated        | 0.51     |                                |                    |          |                                |                    |          |                                |                    |          |
|                    | 6.16–6.12                     | ATP                | −0.53    |                                |                    |          |                                |                    |          |                                |                    |          |
| Early growth stage | 8.00–7.96                     | Unannotated        | 0.59     | 5.04–5.00                      | Unannotated        | 0.55     | 5.04–5.00                      | Unannotated        | 0.57     | 7.56–7.52                      | Trp                | 0.54     |
|                    | 5.04–5.00                     | Unannotated        | 0.58     | 8.00–7.96                      | Unannotated        | 0.55     | 8.00–7.96                      | Unannotated        | 0.56     | 5.04–5.00                      | Unannotated        | 0.54     |
|                    | 0.68–0.64                     | DSS                | 0.56     | 0.68–0.64                      | DSS                | 0.53     | 0.68–0.64                      | DSS                | 0.55     | 8.00–7.96                      | Unannotated        | 0.52     |
|                    | 6.96–6.92                     | Unannotated        | 0.53     | 7.56–7.52                      | Trp                | 0.50     | 1.84–1.80                      | Unannotated        | 0.52     | 2.12–2.08                      | Glu, Gln, Pro      | −0.51    |
|                    | 7.56–7.52                     | Trp                | 0.53     | 1.84–1.80                      | Unannotated        | 0.50     | 2.64–2.60                      | Asp, MA            | −0.52    | 1.92–1.88                      | GABA, Acetate      | −0.54    |
|                    | 1.84–1.80                     | Unannotated        | 0.52     | 2.12–2.08                      | Glu, Gln, Pro      | −0.52    | 2.12–2.08                      | Glu, Gln, Pro      | −0.52    | 2.28–2.24                      | GABA, Val          | −0.55    |
|                    | 6.36–6.32                     | Unannotated        | 0.50     | 2.28–2.24                      | GABA, Val          | −0.55    | 3.04–3.00                      | GABA               | −0.53    | 2.32–2.28                      | GABA, Glu, Pro     | −0.57    |
|                    | 3.04–3.00                     | GABA               | −0.50    | 1.92–1.88                      | GABA, Acetate      | −0.57    | 1.92–1.88                      | GABA, Acetate      | −0.55    | 2.36–2.32                      | Glu, MA            | −0.60    |
|                    | 2.12–2.08                     | Glu, Gln, Pro      | −0.51    | 2.32–2.28                      | GABA, Glu, Pro     | −0.57    | 5.72–5.68                      | Unannotated        | −0.56    | 5.72–5.68                      | Unannotated        | −0.63    |
|                    | 1.88–1.84                     | GABA               | −0.51    | 5.72–5.68                      | Unannotated        | −0.58    | 2.28–2.24                      | GABA, Val          | −0.58    | 2.44–2.40                      | Gln                | −0.65    |
|                    | 4.32–4.28                     | MA                 | −0.51    | 2.36–2.32                      | Glu, MA            | −0.63    | 2.32–2.28                      | GABA, Glu, Pro     | −0.59    | 3.00–2.96                      | GABA, Asn          | −0.69    |
|                    | 2.64–2.60                     | Asp, MA            | −0.52    | 2.44–2.40                      | Gln                | −0.63    | 2.36–2.32                      | Glu, MA            | −0.60    |                                |                    |          |

Table S13. Cont.

| Growth Stage              | Y Variable = DSIs on 4 August |                    |           | Y Variable = DSIs on 11 August |                    |           | Y Variable = DSIs on 17 August |                    |          | Y Variable = DSIs on 24 August |                    |          |
|---------------------------|-------------------------------|--------------------|-----------|--------------------------------|--------------------|-----------|--------------------------------|--------------------|----------|--------------------------------|--------------------|----------|
|                           | Bucket (ppm)                  | Presumed Compounds | <i>r</i>  | Bucket (ppm)                   | Presumed Compounds | <i>r</i>  | Bucket (ppm)                   | Presumed Compounds | <i>r</i> | Bucket (ppm)                   | Presumed Compounds | <i>r</i> |
| Early growth stage        | 2.40–2.36                     | SA, MA             | −0.54     | 3.00–2.96                      | GABA, Asn          | −0.69     | 2.44–2.40                      | Gln                | −0.61    |                                |                    |          |
|                           | 4.28–4.24                     | MA, Thr            | −0.54     |                                |                    |           | 3.00–2.96                      | GABA, Asn          | −0.66    |                                |                    |          |
|                           | 5.72–5.68                     | Unannotated        | −0.57     |                                |                    |           |                                |                    |          |                                |                    |          |
|                           | 1.92–1.88                     | GABA, Acetate      | −0.58     |                                |                    |           |                                |                    |          |                                |                    |          |
|                           | 2.28–2.24                     | GABA, Val          | −0.59     |                                |                    |           |                                |                    |          |                                |                    |          |
|                           | 2.32–2.28                     | GABA, Glu, Pro     | −0.59     |                                |                    |           |                                |                    |          |                                |                    |          |
|                           | 2.44–2.40                     | Gln                | −0.63     |                                |                    |           |                                |                    |          |                                |                    |          |
|                           | 2.36–2.32                     | Glu, MA            | −0.65     |                                |                    |           |                                |                    |          |                                |                    |          |
|                           | 3.00–2.96                     | GABA, Asn          | −0.70     |                                |                    |           |                                |                    |          |                                |                    |          |
| Root-enlargement stage    | 5.04–5.00                     | Unannotated        | 0.66      | 5.04–5.00                      | Unannotated        | 0.63      | 5.04–5.00                      | Unannotated        | 0.65     | 5.04–5.00                      | Unannotated        | 0.59     |
|                           | 8.00–7.96                     | Unannotated        | 0.57      | 8.00–7.96                      | Unannotated        | 0.53      | 8.00–7.96                      | Unannotated        | 0.56     | 8.00–7.96                      | Unannotated        | 0.52     |
|                           | 5.72–5.68                     | Unannotated        | −0.52     | 2.44–2.40                      | Gln                | −0.53     | 6.80–6.76                      | Unannotated        | 0.54     | 3.12–3.08                      | Ethanolamine       | −0.50    |
|                           | 2.44–2.40                     | Gln                | −0.52     | 5.72–5.68                      | Unannotated        | −0.55     | 5.72–5.68                      | Unannotated        | −0.52    | 2.44–2.40                      | Gln                | −0.52    |
|                           |                               |                    |           |                                |                    |           | 2.44–2.40                      | Gln                | −0.53    | 5.72–5.68                      | Unannotated        | −0.59    |
| Disease development stage | 3.96–3.92                     | Unannotated        | 0.64      | 3.96–3.92                      | Unannotated        | 0.62      | 3.96–3.92                      | Unannotated        | 0.64     | 3.96–3.92                      | Unannotated        | 0.58     |
|                           | 8.00–7.96                     | Unannotated        | 0.59      | 3.6–3.56                       | Suc, Fru           | 0.56      | 8.00–7.96                      | Unannotated        | 0.58     | 3.60–3.56                      | Suc, Fru           | 0.56     |
|                           | 3.60–3.56                     | Suc, Fru           | 0.54      | 8.00–7.96                      | Unannotated        | 0.55      | 3.60–3.56                      | Suc, Fru           | 0.56     | 8.00–7.96                      | Unannotated        | 0.54     |
|                           | 1.12–1.08                     | Unannotated        | 0.52      | 1.28–1.24                      | Ile                | 0.53      | 4.04–4.00                      | Suc, Fru           | 0.52     | 4.04–4.00                      | Suc, Fru           | 0.51     |
|                           | 1.28–1.24                     | Ile                | 0.52      | 4.04–4.00                      | Suc, Fru           | 0.52      | 4.00–3.96                      | Fru                | 0.52     |                                |                    |          |
|                           |                               |                    |           | 4.00–3.96                      | Fru                | 0.52      | 1.12–1.08                      | Unannotated        | 0.51     |                                |                    |          |
|                           |                               |                    |           | 1.12–1.08                      | Unannotated        | 0.52      | 1.28–1.24                      | Ile                | 0.51     |                                |                    |          |
|                           |                               |                    | 4.12–4.08 | Fru                            | 0.51               | 4.12–4.08 | Fru                            | 0.51               |          |                                |                    |          |

**Table S14.** The NMR buckets strongly contributing to discriminating CLS resistance in sugar beet leaves.

| Growth Stage              | Bucket (ppm) | Presumed Compounds | OPLS-VIP                    |      |      |      | Pearson's Correlation for |       |       |       | Welch's <i>t</i> -Test <i>p</i> -Value |
|---------------------------|--------------|--------------------|-----------------------------|------|------|------|---------------------------|-------|-------|-------|----------------------------------------|
|                           |              |                    | Y Variable = DSIs on August |      |      |      | DSIs on August            |       |       |       |                                        |
|                           |              |                    | 3                           | 11   | 17   | 24   | 3                         | 11    | 17    | 24    |                                        |
| Seedling stage            | 3.96–3.92    | Unidentified       | 2.07                        | 2.01 | 2.02 | 2.27 | 0.55                      | 0.52  | 0.52  | 0.52  | 0.00404                                |
| Early growth stage        | 3.00–2.96    | GABA, Asn          | 2.52                        | 2.55 | 2.44 | 2.60 | −0.70                     | −0.69 | −0.66 | −0.69 | 0.00011                                |
|                           | 2.44–2.40    | Gln                | 1.97                        | 2.04 | 1.97 | 2.28 | −0.63                     | −0.63 | −0.61 | −0.65 | 0.00266                                |
|                           | 2.32–2.28    | GABA, Glu, Pro     | 1.93                        | 1.94 | 1.99 | 2.11 | −0.59                     | −0.57 | −0.59 | −0.57 | 0.00048                                |
|                           | 2.28–2.24    | GABA, Val          | 1.90                        | 1.87 | 2.03 | 2.11 | −0.59                     | −0.55 | −0.58 | −0.55 | 0.00016                                |
|                           | 1.92–1.88    | GABA, Acetate      | 1.82                        | 1.86 | 1.79 | 1.82 | −0.58                     | −0.57 | −0.55 | −0.54 | 0.00356                                |
| Root-enlargement stage    | 5.04–5.00    | Unidentified       | 2.50                        | 2.48 | 2.49 | 2.40 | 0.66                      | 0.63  | 0.65  | 0.59  | 0.00003                                |
|                           | 8.00–7.96    | Unidentified       | 2.16                        | 2.15 | 2.18 | 2.12 | 0.57                      | 0.53  | 0.56  | 0.52  | 0.00075                                |
|                           | 2.44–2.40    | Gln                | 2.15                        | 2.22 | 2.12 | 2.25 | −0.52                     | −0.53 | −0.53 | −0.52 | 0.01508                                |
| Disease-development stage | 3.96–3.92    | Unidentified       | 2.62                        | 2.53 | 2.59 | 2.36 | 0.52                      | 0.53  | 0.64  | 0.56  | 0.00014                                |
|                           | 3.60–3.56    | Suc/Fru            | 2.38                        | 2.46 | 2.45 | 2.34 | 0.54                      | 0.53  | 0.56  | 0.56  | 0.00314                                |
|                           | 8.00–7.96    | Unidentified       | 2.34                        | 2.22 | 2.32 | 2.14 | 0.59                      | 0.51  | 0.58  | 0.54  | 0.00199                                |
